# Supplementary material for: Unconscious priming shares a common resource pool with the manipulation subsystem
Source: PeerJ. 2022 Apr 19;10:e13312. doi: 10.7717/peerj.13312 (PMC9029430; doi:10.7717/peerj.13312)
Supplement: Supplemental Information 1 — The mean reaction time and accuracy of each participant in the maintenance dual task and the manipulation dual task. [file peerj-10-13312-s001.xlsx]

## Sheet: 1
	Maintenance Dual Task
Sandwich Masking Task	ACC1	ACC2	ACC3	ACC4	ACC5	ACC6	ACC7	ACC8	ACC9	RT1	RT2	RT3	RT4	RT5	RT6	RT7	RT8	RT9	Working-memory Task	ACC_1	ACC_2	ACC_3	ACC_4	ACC_5	ACC_6	ACC_7	ACC_8	ACC_9	RT_1	RT_2	RT_3	RT_4	RT_5	RT_6	RT_7	RT_8	RT_9
1	1	1	1	1	1	1	1	1	1	429	519	563	420	604	642	417	477	353	low	1	1	1	1	1	1	1	1	1	526	1075	470	848	508	972	437	856	2464
2	0	1	1	1	1	1	1	0	1	421	519	422	338	464	522	391	882	635	low	1	1	1	1	1	1	1	1	1	948	904	700	1072	659	786	1931	737	1010
3	1	1	1	1	1	1	1	1	1	479	459	536	423	362	345	523	348	584	low	1	1	1	1	1	1	1	1	1	571	664	518	568	652	665	1740	716	790
4	1	0	1	1	1	1	1	1	1	531	427	396	462	284	384	421	323	354	low	1	1	1	1	1	1	1	1	1	516	515	856	468	573	515	497	771	931
5	1	1	1	1	1	1	1	1	1	336	375	356	318	503	366	542	405	883	low	1	1	1	1	1	1	1	1	1	2627	1741	2107	1991	1996	1478	871	2139	1429
6	1	1	1	1	1	0	1	1	1	513	473	485	350	473	456	399	882	571	low	1	1	1	1	1	0	1	1	1	494	381	1253	661	796	1134	1329	526	530
7	1	1	1	1	1	1	1	1	1	751	356	336	396	390	349	479	333	560	low	1	1	1	1	1	1	1	1	1	507	396	1077	454	560	1090	551	799	376
8	1	1	1	1	1	1	1	1	1	491	599	540	535	559	632	447	432	362	low	1	1	1	1	1	0	1	1	1	1168	1028	1029	558	807	989	1164	609	465
9	1	1	1	1	1	1	1	1	1	523	556	881	720	652	520	542	752	458	low	1	1	1	1	1	1	1	1	1	848	1200	816	954	549	827	1071	468	378
10	1	1	1	1	1	1	1	1	1	572	472	471	445	481	561	430	640	470	low	1	0	0	1	1	1	1	1	1	631	596	1090	1241	621	566	1270	342	783
11	1	1	1	1	1	1	1	1	1	349	727	450	451	509	531	667	757	648	low	1	1	1	1	1	1	1	1	1	1224	605	4667	451	619	552	960	377	1133
12	1	1	1	1	1	1	1	1	1	514	546	684	693	716	448	462	630	485	low	1	1	1	1	1	1	1	1	1	880	826	437	867	715	563	840	526	700
13	1	1	1	1	1	1	1	1	1	341	619	626	446	691	431	534	591	879	low	1	1	1	0	1	1	1	1	1	459	1153	1353	844	673	940	559	507	553
14	1	1	1	1	1	1	1	1	1	481	348	596	421	395	402	378	635	824	low	1	1	1	1	1	1	1	1	1	494	789	816	783	594	2033	430	596	640
15	1	1	1	1	1	1	1	1	1	522	483	421	618	337	368	415	467	534	low	1	1	1	1	1	1	1	1	1	566	851	518	502	918	1166	393	830	552
16	1	1	1	1	1	1	1	1	1	393	350	514	626	472	317	353	400	525	low	1	1	1	1	1	1	1	1	1	510	614	530	596	689	1513	542	434	613
17	1	1	1	1	1	1	1	1	1	417	331	400	377	298	390	395	321	353	low	1	1	1	1	1	1	1	1	1	461	1771	445	763	607	705	1047	389	714
18	1	1	1	1	1	1	1	1	1	431	801	358	332	322	409	927	347	1163	low	1	1	1	1	1	1	1	1	1	586	913	840	666	923	930	443	392	732
19	1	1	1	1	1	1	1	0	1	362	638	403	343	429	404	365	328	413	low	1	1	1	1	1	1	1	1	1	1934	1456	1288	984	1469	1130	924	635	461
20	1	1	1	1	1	1	1	1	1	366	514	701	446	797	457	594	394	350	low	1	1	1	1	1	1	1	1	1	715	865	871	1016	2458	2178	929	432	627
21	1	1	1	1	1	0	1	1	1	457	532	458	381	547	418	568	1260	966	high	1	1	1	1	1	1	1	1	1	2096	1710	3096	1557	2721	2641	1791	2117	2786
22	1	1	1	1	1	1	1	1	1	1500	551	565	474	328	460	443	678	1477	high	1	1	1	1	1	1	1	1	1	1777	1646	1689	2738	1481	1595	2273	1667	2189
23	1	1	1	1	1	1	1	1	1	415	476	666	383	496	405	1255	1235	518	high	1	1	1	1	1	1	1	1	1	2731	1190	725	1138	669	1028	615	1159	1212
24	1	1	1	1	1	1	1	1	1	504	497	439	578	401	470	608	428	1282	high	1	1	1	1	1	1	1	1	1	850	618	803	1076	640	1625	1154	1476	916
25	1	1	1	1	1	1	1	1	1	414	522	704	522	950	373	1781	1274	790	high	1	1	1	1	1	1	1	1	1	1066	969	869	1775	532	2275	796	1265	1002
26	1	1	1	1	1	1	1	1	1	1815	564	350	402	621	432	812	477	568	high	1	1	1	1	1	1	1	1	1	876	863	3216	543	1074	3103	825	701	1717
27	1	1	1	1	1	1	1	1	1	433	349	425	292	481	469	454	634	1030	high	1	1	1	1	1	1	1	0	1	2689	795	1081	603	481	577	1899	3748	1275
28	1	1	1	1	1	1	1	1	1	471	1800	579	597	311	361	384	304	436	high	1	1	1	1	1	1	1	1	1	769	787	3071	1061	1142	1436	790	658	1181
29	1	1	1	1	1	1	1	1	1	656	995	1051	798	1474	586	887	660	452	high	1	1	1	1	1	1	1	1	1	527	709	4018	570	546	638	1243	1433	2309
30	1	1	1	1	1	1	1	1	1	1193	1156	2560	799	559	980	497	568	431	high	1	1	1	1	1	1	1	1	1	383	2147	555	446	784	1530	538	402	1374
31	1	1	1	1	1	1	1	0	1	837	877	817	1013	642	1253	1394	546	401	high	0	1	1	1	1	0	1	1	1	2788	1131	1305	2699	2601	0	4233	2790	1835
32	1	1	1	1	1	1	1	1	1	1276	522	596	1182	1110	529	603	601	406	high	1	1	0	1	1	1	0	1	1	4443	2960	678	2637	3029	2011	4481	1420	1398
33	1	1	1	1	1	1	1	1	0	523	392	468	388	1037	314	496	347	634	high	0	1	1	1	1	1	1	1	1	0	1476	2668	1147	3780	2719	4728	4327	3859
34	1	0	1	1	1	1	1	1	1	604	731	496	895	774	777	680	1177	408	high	1	1	1	1	1	1	1	1	1	1193	1879	951	1426	1990	2002	3076	1022	3674
35	1	1	1	1	1	1	1	1	1	571	916	1041	483	561	680	597	449	418	high	1	1	1	1	1	1	1	1	1	1713	1363	2921	2785	954	1933	2680	3085	3474
36	1	1	1	1	1	1	1	1	1	628	1092	945	609	527	431	696	335	449	high	1	1	1	1	1	1	1	1	1	2536	2934	851	2703	1278	2740	1776	2149	1318
37	1	1	1	1	1	1	1	1	1	597	940	859	470	513	1045	474	586	297	high	1	1	1	1	1	1	1	1	1	1652	2009	2047	2228	1249	2098	2883	2819	2951
38	1	1	1	1	1	1	1	1	1	963	793	731	654	969	467	406	552	442	high	1	0	1	0	1	1	0	0	1	1052	1816	1903	3007	1743	1561	2883	0	2947
39	1	1	1	1	1	1	1	1	1	595	631	470	633	469	596	689	593	683	high	1	1	1	1	1	1	1	1	1	1374	3365	3371	780	3295	1133	1266	1814	2002
40	1	1	1	1	1	1	1	1	1	615	740	502	511	631	2342	862	1695	418	high	1	1	1	1	1	1	1	1	1	1980	2860	1582	2704	2549	3439	3265	3258	2123
	Manipulation Dual Task
Sandwich Masking Task	ACC1	ACC2	ACC3	ACC4	ACC5	ACC6	ACC7	ACC8	ACC9	RT1	RT2	RT3	RT4	RT5	RT6	RT7	RT8	RT9	Working-memory Task	ACC_1	ACC_2	ACC_3	ACC_4	ACC_5	ACC_6	ACC_7	ACC_8	ACC_9	RT_1	RT_2	RT_3	RT_4	RT_5	RT_6	RT_7	RT_8	RT_9
1	1	1	1	1	1	1	1	1	1	318	398	413	349	469	425	695	485	483	low	1	1	1	1	1	1	1	1	1	504	453	584	803	398	1376	544	778	605
2	1	1	1	1	1	1	1	1	1	440	523	514	463	536	381	381	456	2201	low	1	1	1	1	1	1	1	1	1	576	811	656	578	614	418	698	1256	785
3	1	1	1	1	1	1	1	1	1	427	373	452	429	499	374	355	393	454	low	1	1	1	1	1	1	1	1	1	2130	491	651	967	797	587	767	1289	631
4	1	1	1	1	1	1	1	1	1	433	433	454	440	431	491	380	372	384	low	1	1	1	1	1	1	1	1	1	734	571	700	452	594	609	640	1156	1410
5	1	1	1	1	1	1	1	1	1	576	452	428	567	383	417	427	387	486	low	1	1	1	1	0	0	1	1	1	585	416	522	1183	674	489	600	731	1033
6	1	0	1	1	1	1	1	1	1	514	0	2912	417	376	449	361	636	347	low	1	1	1	1	0	0	1	1	1	675	1309	1469	1353	815	1222	696	814	1904
7	1	1	1	1	1	1	1	1	1	408	345	438	453	404	521	321	341	463	low	1	1	1	1	1	1	1	1	1	593	596	1615	1011	732	1074	630	602	721
8	1	0	0	1	1	1	1	1	1	297	1080	836	412	415	381	366	375	354	low	1	0	1	1	1	1	1	1	1	464	445	792	953	854	584	937	721	1028
9	1	1	1	1	0	1	1	1	1	258	351	484	573	348	477	556	362	498	low	1	1	1	1	1	1	0	1	1	1508	616	636	807	403	382	1126	584	686
10	1	0	0	0	1	1	1	1	1	340	478	117	311	184	211	452	159	386	low	0	1	1	1	1	1	1	1	1	473	721	398	1007	995	847	728	1335	1385
11	1	1	1	1	1	1	1	1	1	705	467	404	463	489	538	449	2060	405	low	1	1	1	1	1	1	1	1	1	1351	752	546	414	393	720	578	899	695
12	1	1	1	1	1	1	1	1	1	386	478	470	451	439	358	433	474	408	low	1	0	1	1	1	1	1	1	1	1570	897	712	870	1384	602	839	701	625
13	1	1	1	1	1	1	1	1	1	470	498	427	393	475	433	528	388	358	low	0	1	1	1	1	0	1	1	1	1710	920	1098	1267	1143	697	1182	2038	1013
14	1	1	1	1	1	1	1	1	1	418	2336	437	446	682	450	432	732	538	low	1	1	1	1	1	1	0	1	1	1219	643	627	609	456	1031	1014	712	515
15	1	1	1	1	1	1	1	1	1	437	356	390	357	436	483	440	460	449	low	1	1	1	0	1	1	1	1	1	357	345	1698	2275	1010	775	514	641	740
16	1	1	1	1	1	1	1	1	1	398	385	476	380	417	445	317	491	464	low	1	0	1	1	1	1	1	1	1	737	1007	1738	617	465	774	513	1090	4424
17	1	1	1	1	1	1	1	1	1	524	373	436	644	609	416	355	438	493	low	1	1	1	1	1	1	1	1	1	515	993	807	1380	361	1298	975	955	417
18	1	1	1	1	1	1	1	1	1	540	390	389	594	473	1180	464	501	422	low	0	1	1	1	1	1	1	1	1	505	399	539	533	695	2596	544	856	699
19	1	1	1	1	1	1	1	1	1	442	660	418	523	384	370	433	369	465	low	1	1	1	1	1	1	1	1	1	651	1984	1223	2330	716	2186	3183	1539	1226
20	1	1	1	1	1	1	1	1	1	383	453	370	363	462	477	422	882	411	low	1	1	1	0	1	1	1	1	1	895	1338	1100	2251	685	1553	3089	2740	794
21	1	1	1	1	1	1	1	1	1	367	400	448	478	479	517	489	636	467	high	1	1	1	0	1	1	1	1	1	491	622	1093	1067	949	1067	1450	1857	1397
22	1	1	1	1	1	1	1	1	1	1091	387	383	439	1185	429	404	444	586	high	1	1	1	1	1	1	1	1	1	1765	800	769	1105	2049	3278	1570	1139	705
23	1	1	0	1	1	1	1	1	1	465	527	257	416	355	461	445	333	431	high	1	1	1	1	1	1	1	1	1	572	929	728	648	756	849	906	614	1080
24	1	1	1	1	1	1	1	1	1	441	457	439	343	383	430	337	352	321	high	1	1	1	1	1	1	1	1	1	875	943	1502	1528	1687	1289	501	1317	684
25	1	1	1	1	1	1	1	1	1	489	465	390	389	414	394	407	353	386	high	1	1	1	1	1	1	1	1	1	799	523	2033	773	695	4181	1744	1090	509
26	1	1	1	1	1	1	1	1	1	405	495	373	451	363	377	360	387	874	high	1	1	1	1	1	1	1	1	1	2435	4452	708	2017	2692	1419	1783	2972	1460
27	1	1	1	1	1	1	1	1	1	292	380	366	491	492	408	484	414	427	high	1	1	1	1	1	1	1	1	1	2469	2702	1217	2385	654	923	2482	1298	1668
28	1	1	1	1	1	1	1	1	1	1285	398	424	452	343	485	348	370	556	high	1	1	1	1	1	1	1	1	1	2597	2417	1504	1435	550	1142	998	1512	1460
29	1	1	1	0	1	1	1	1	1	865	421	1091	437	402	382	395	527	348	high	1	1	1	1	1	1	1	1	1	3652	1401	2561	1061	717	1842	1634	3493	1163
30	1	1	1	1	1	1	1	1	1	1007	397	426	457	446	463	362	792	388	high	1	1	1	1	1	1	1	1	1	2906	2236	2784	1422	2420	1518	1036	1567	1858
31	1	1	1	1	1	1	1	1	1	428	396	390	363	512	400	417	385	618	high	1	1	1	1	1	1	1	1	1	1674	1687	1330	796	768	2021	2255	1536	1495
32	1	1	1	1	1	1	1	1	1	423	396	404	408	575	633	450	363	672	high	1	0	1	1	1	1	1	1	1	1478	1535	1521	802	893	3543	1346	1602	1499
33	1	0	1	1	1	1	1	1	1	395	293	417	525	602	621	456	1224	812	high	1	1	1	1	1	1	1	1	1	1605	1449	1427	1161	1773	1388	655	740	825
34	1	1	1	1	1	1	0	0	1	510	883	908	368	406	722	0	0	380	high	1	1	1	1	1	1	1	1	1	1367	1034	1772	886	1979	2735	1003	631	1562
35	1	0	1	1	1	1	1	1	1	408	320	1153	413	530	487	764	427	376	high	1	1	0	1	1	1	1	1	1	1984	2784	1334	4011	753	1412	1839	743	990
36	1	1	1	1	1	1	1	1	1	640	450	828	1235	597	822	1251	366	791	high	1	1	1	1	1	1	1	1	1	1861	2753	602	1592	909	1783	1386	1143	1271
37	1	1	1	1	1	1	0	1	1	624	344	498	571	527	523	0	2103	1278	high	1	1	1	1	1	1	1	1	1	2529	1284	947	749	785	1935	2731	666	1938
38	1	1	1	1	1	1	1	1	1	538	735	373	454	491	415	585	1770	532	high	1	1	1	1	0	1	1	1	0	855	669	924	1508	1132	1424	1227	1391	3827
39	1	1	0	1	1	1	1	1	1	403	346	0	413	479	429	769	996	575	high	1	1	1	1	1	1	1	1	1	665	582	1646	1570	842	816	1339	1601	1557
40	0	1	1	1	1	1	1	1	1	600	1235	975	452	538	389	888	839	902	high	1	1	1	0	1	1	1	1	0	702	871	1013	612	760	948	1194	783	872

## Sheet: 2
	Maintenance Dual Task
Sandwich Masking Task	ACC1	ACC2	ACC3	ACC4	ACC5	ACC6	ACC7	ACC8	ACC9	RT1	RT2	RT3	RT4	RT5	RT6	RT7	RT8	RT9	Working-memory Task	ACC_1	ACC_2	ACC_3	ACC_4	ACC_5	ACC_6	ACC_7	ACC_8	ACC_9	RT_1	RT_2	RT_3	RT_4	RT_5	RT_6	RT_7	RT_8	RT_9
1	1	1	1	1	1	1	1	1	1	412	1435	661	405	551	1154	507	500	667	low	1	1	1	1	1	1	1	1	1	683	511	424	592	525	497	677	397	1138
2	1	1	1	1	1	1	1	1	1	664	624	569	436	680	769	447	513	477	low	1	1	1	1	1	1	1	1	1	489	476	746	410	544	466	1472	558	773
3	1	1	1	1	1	1	1	1	1	428	464	371	1147	355	599	401	474	597	low	1	1	1	1	1	1	1	1	1	465	369	420	389	473	411	454	558	701
4	1	1	1	1	1	1	1	1	1	408	352	539	1776	653	445	546	449	375	low	1	1	1	1	1	1	1	1	1	498	479	626	579	530	429	357	382	416
5	1	1	1	1	1	1	1	1	1	628	651	518	526	465	687	534	692	508	low	1	1	1	1	1	1	1	1	1	839	497	784	1219	386	1144	493	664	525
6	1	1	1	1	1	1	1	1	1	426	481	549	473	522	547	424	919	536	low	1	1	1	1	1	1	1	1	1	621	1032	1562	577	501	529	652	872	1326
7	1	1	1	1	1	1	1	1	1	560	454	618	377	468	368	880	475	469	low	1	1	1	1	1	1	1	1	1	555	630	1879	1745	1114	730	963	605	1168
8	1	1	1	1	1	1	1	1	1	796	477	546	403	526	537	498	451	493	low	1	1	1	1	1	1	1	1	1	580	556	683	1039	644	882	972	799	852
9	1	1	1	1	1	1	1	1	1	434	329	357	342	503	506	446	1073	378	low	1	1	1	1	1	1	1	1	1	1628	1883	2083	4625	2239	1008	450	1524	1448
10	1	1	1	1	1	1	1	1	1	451	496	484	371	382	348	442	381	404	low	1	1	1	1	1	1	1	1	1	1284	1038	1510	1467	1064	1853	3481	1487	1459
11	1	1	1	1	1	1	1	1	1	513	485	421	475	309	484	565	886	488	low	1	1	1	1	1	1	1	1	1	1129	701	2796	1498	978	1497	1262	673	1445
12	1	1	1	1	1	1	1	1	1	424	321	494	452	499	474	390	383	431	low	1	1	1	1	1	1	1	1	1	501	865	717	1258	971	904	1185	601	1078
13	1	1	1	1	1	1	1	1	1	597	339	461	452	286	621	411	505	361	low	1	1	1	1	1	1	1	1	1	967	886	533	2178	763	1675	865	2099	580
14	1	1	1	1	1	1	1	1	1	706	379	509	369	368	1130	646	447	516	low	1	1	1	1	1	1	1	1	1	532	807	509	2714	913	1480	711	1119	718
15	1	1	1	1	1	1	1	1	1	624	566	461	359	573	429	342	414	373	low	1	1	1	1	1	1	1	1	1	1051	3186	1087	1025	851	972	887	1728	700
16	1	0	1	1	1	1	1	1	1	487	396	599	400	1297	436	722	335	439	low	1	1	1	1	1	1	1	1	1	958	1099	2166	848	3525	1032	1252	2252	963
17	1	1	1	1	1	1	0	1	1	671	410	491	484	480	524	365	523	487	low	1	1	1	1	1	1	1	1	1	548	783	634	1098	1473	1138	2134	842	913
18	1	1	1	1	1	1	1	1	1	487	473	409	1160	860	569	506	532	450	low	1	1	1	1	1	1	1	1	1	1028	1041	4699	623	651	1299	839	543	668
19	1	1	0	1	1	1	1	1	1	513	595	305	677	464	520	532	445	553	low	1	1	1	1	1	1	1	1	1	1946	1719	818	1421	761	2125	1685	1234	1071
20	1	1	1	1	1	1	1	1	1	459	499	477	541	492	403	774	554	1039	low	1	1	1	1	1	1	1	1	1	1247	519	596	1176	1539	1730	823	1001	1495
21	1	1	1	1	1	1	1	1	1	779	452	684	600	409	508	542	540	1174	high	1	1	1	1	1	1	1	1	1	1465	692	839	1793	711	1225	502	588	704
22	1	1	1	1	1	1	1	1	1	448	670	639	425	1030	380	539	778	435	high	1	1	1	1	1	1	1	1	1	750	807	1610	819	771	987	779	746	543
23	1	1	1	1	1	1	1	1	1	779	404	378	601	489	771	375	651	634	high	1	1	1	1	1	1	1	1	1	737	695	1027	681	912	694	1335	576	719
24	1	1	1	1	1	1	1	1	1	574	562	525	825	386	486	587	500	572	high	1	1	1	1	1	1	1	1	1	674	762	1933	583	1110	834	580	573	682
25	1	1	1	1	1	1	1	1	1	496	515	822	512	465	416	498	482	770	high	1	1	1	1	1	1	1	1	1	1517	1958	892	1615	2579	4984	1242	1020	763
26	1	1	1	1	1	1	1	1	1	424	506	549	648	525	871	480	389	610	high	1	1	1	1	1	0	1	1	1	1233	1313	1211	1131	2667	0	575	1543	573
27	1	1	1	1	1	1	1	1	1	463	374	384	525	340	627	413	472	503	high	1	1	1	1	0	1	1	1	1	1194	577	2782	640	1570	1422	639	1250	1029
28	1	1	1	1	1	1	1	1	1	451	487	429	369	574	289	468	346	384	high	1	1	1	1	1	1	1	1	1	1668	2468	4290	1053	1373	2729	667	1072	1711
29	1	1	1	1	1	1	1	1	1	794	366	452	411	453	401	422	475	523	high	1	1	1	1	1	0	1	1	1	1225	618	2767	1970	962	1630	2679	825	2799
30	1	1	1	1	1	1	1	1	1	404	367	337	666	493	580	473	408	506	high	1	1	1	1	1	1	1	1	1	3513	1438	1517	639	1752	2448	1277	881	1161
31	1	1	1	1	1	1	1	1	1	605	528	454	1769	420	474	576	437	574	high	1	1	1	1	1	1	1	1	1	2526	3566	1140	2243	787	913	1680	733	1984
32	1	1	1	1	1	1	1	1	1	518	488	371	330	419	400	457	513	457	high	1	1	1	1	1	1	1	1	1	1201	4705	2247	726	1367	2094	632	992	1603
33	1	1	1	1	1	1	1	1	1	473	478	474	993	1350	403	831	553	468	high	1	1	1	1	1	1	1	1	1	2958	2882	1331	2235	906	2618	1432	1823	701
34	1	1	1	1	1	1	1	1	1	901	362	443	743	526	414	397	477	379	high	1	1	1	0	1	1	0	1	1	1254	1487	868	1727	1136	1212	0	1950	684
35	1	0	1	1	1	1	1	1	1	1075	0	900	517	468	486	693	1198	431	high	1	1	1	0	1	1	1	1	1	682	1315	1885	0	1124	983	1604	1425	879
36	1	1	1	1	1	1	1	1	1	522	703	372	401	433	433	478	666	545	high	1	1	0	1	1	1	1	1	0	3233	4147	1023	1889	721	4230	1042	1900	490
37	1	1	1	1	1	1	1	1	1	741	390	1212	404	620	431	386	930	520	high	1	1	1	1	1	1	1	1	1	979	3722	930	1055	4037	3708	882	1299	630
38	1	1	1	1	0	1	1	1	1	344	422	447	471	406	509	565	366	533	high	1	1	1	1	1	1	1	1	1	1023	1203	789	3976	1772	2596	950	1444	883
39	1	1	1	1	1	1	1	1	1	461	500	521	440	439	433	1037	389	419	high	1	1	1	1	1	1	0	1	1	445	714	1756	1247	1168	1026	510	3431	598
40	1	1	1	1	1	1	1	1	1	703	432	389	529	472	384	408	611	435	high	1	1	1	1	1	1	1	1	1	920	1502	1769	2214	1676	905	1938	1463	1008
	Manipulation Dual Task
Sandwich Masking Task	ACC1	ACC2	ACC3	ACC4	ACC5	ACC6	ACC7	ACC8	ACC9	RT1	RT2	RT3	RT4	RT5	RT6	RT7	RT8	RT9	Working-memory Task	ACC_1	ACC_2	ACC_3	ACC_4	ACC_5	ACC_6	ACC_7	ACC_8	ACC_9	RT_1	RT_2	RT_3	RT_4	RT_5	RT_6	RT_7	RT_8	RT_9
1	1	1	1	1	1	1	1	1	1	663	625	1084	554	1149	768	710	1217	1162	low	1	1	1	1	1	1	1	1	1	833	813	592	1044	649	1421	575	1310	792
2	1	1	1	1	1	1	1	1	1	653	636	626	603	620	637	473	624	527	low	1	1	1	1	1	1	1	1	1	581	500	599	586	471	554	520	636	956
3	1	1	1	1	1	1	1	1	1	1121	1509	716	1883	2329	1531	933	798	2030	low	1	1	1	1	1	1	1	1	1	733	702	754	542	637	636	1169	607	505
4	1	1	1	1	1	1	1	1	1	1401	906	1253	932	562	763	619	1009	693	low	1	1	1	1	1	1	1	1	1	517	613	594	659	643	776	448	506	500
5	1	1	1	1	1	1	1	1	1	712	672	620	594	1109	826	1295	1527	796	low	1	1	1	1	0	1	1	1	1	928	662	1035	1472	2129	979	881	996	682
6	1	1	1	1	1	1	1	1	1	586	643	631	582	595	612	671	972	661	low	1	1	1	1	1	1	1	1	1	565	617	2505	1469	1492	766	1642	938	821
7	1	1	1	1	1	1	1	1	1	633	728	697	597	761	673	1066	661	660	low	1	1	1	1	0	1	1	1	1	814	721	1306	1400	1165	1319	664	1198	704
8	1	1	1	1	1	1	1	1	1	680	736	600	737	534	621	775	1035	1190	low	1	1	1	1	1	1	1	1	1	962	1475	793	1232	1939	1027	792	900	674
9	1	1	1	1	1	1	1	1	1	619	925	836	796	1123	1925	841	695	583	low	1	1	1	1	0	1	1	1	1	727	914	1008	1023	2655	2273	839	1962	568
10	1	1	1	1	1	1	1	1	1	692	617	1017	594	1258	591	568	773	527	low	1	1	1	1	1	1	1	1	1	532	854	1992	2099	918	2585	1054	1117	1860
11	1	1	1	1	1	1	1	1	1	548	856	730	904	806	498	520	1031	749	low	1	1	1	1	1	1	1	1	1	808	1213	1128	1037	1576	1495	1342	1010	1046
12	1	1	1	1	1	1	1	1	1	725	562	679	744	625	874	820	850	953	low	1	1	1	1	0	0	0	1	1	921	1249	823	931	1992	164	0	1341	619
13	1	1	1	1	1	1	1	1	1	729	750	558	652	654	501	603	726	783	low	1	1	1	1	0	1	1	1	1	688	2949	1316	648	1990	1035	1407	824	2010
14	1	1	1	1	1	1	1	1	1	551	650	718	509	658	634	575	578	396	low	1	1	1	1	1	1	1	1	1	887	1324	767	1349	803	3020	1377	1077	1381
15	1	1	1	1	1	1	1	1	1	563	1032	1082	1001	676	1108	596	1898	1004	low	1	1	1	1	1	1	1	1	1	934	679	931	1427	592	856	865	1007	504
16	1	1	1	1	0	1	1	1	1	674	832	1745	572	1503	536	474	506	477	low	1	1	1	1	1	1	1	1	1	818	497	646	651	622	576	411	973	758
17	1	1	1	1	1	1	1	1	1	696	1221	773	853	547	583	627	645	621	low	1	1	1	1	1	1	1	1	1	706	640	656	506	933	612	610	742	779
18	1	1	1	1	1	1	1	1	1	1601	819	846	606	543	2101	670	692	447	low	1	0	1	1	1	0	1	1	1	662	746	567	613	562	941	453	695	513
19	1	1	1	1	1	1	1	1	1	761	733	1112	586	1406	592	677	632	810	low	1	1	1	1	0	1	1	1	1	603	406	701	1425	1312	646	700	824	502
20	1	1	1	1	1	1	1	1	1	677	596	570	1586	625	726	614	718	630	low	1	1	1	1	1	1	1	1	1	567	1069	725	1050	521	605	724	535	433
21	1	1	1	1	1	1	1	1	1	734	1334	667	623	730	562	1844	1197	638	high	1	1	1	1	1	1	1	1	1	4135	2473	1194	691	837	2421	4194	1149	2963
22	1	1	1	1	1	1	1	1	1	605	595	1076	614	651	958	533	853	669	high	1	1	0	1	1	1	1	1	1	4938	898	1623	900	2156	3197	3759	1487	906
23	1	1	1	1	1	1	1	1	1	1047	790	1058	1027	1023	920	746	553	437	high	1	1	1	1	1	1	1	0	1	1534	1239	4499	868	3311	2747	3383	713	1352
24	1	1	1	1	1	1	1	1	1	1015	2611	1807	607	661	1110	753	794	653	high	1	1	1	1	1	1	1	1	1	2359	1181	1296	885	3855	2844	2465	1010	1720
25	1	1	1	1	1	1	1	1	1	605	594	588	548	759	531	578	501	705	high	1	1	1	1	1	1	0	1	1	3555	2201	1248	2500	509	1051	1082	1601	1357
26	1	1	1	1	1	1	1	1	1	633	1686	883	857	638	790	724	577	676	high	0	1	1	1	1	1	1	1	1	1358	1777	2393	983	705	2346	1361	630	492
27	1	1	1	1	1	1	1	1	1	518	848	325	1976	918	740	1242	1020	1438	high	1	1	1	1	1	1	1	1	1	1657	1256	1985	745	3110	2519	1257	1279	1856
28	1	1	1	1	1	1	1	1	1	1866	1767	1028	871	1065	1121	2511	951	796	high	1	1	1	1	1	1	1	1	1	1781	770	1070	2680	2482	2831	1171	1245	1320
29	1	1	1	1	1	1	1	1	1	1583	553	1148	892	1653	1159	589	663	1567	high	1	1	1	1	1	1	1	0	1	1584	1631	1264	763	2488	4008	1211	2390	2442
30	1	1	1	1	1	1	1	1	1	1513	1261	680	1267	554	558	1265	617	1121	high	1	1	1	1	1	1	1	1	1	1104	1155	1227	1525	1279	1322	2068	1876	2270
31	1	1	1	1	1	1	1	1	1	858	600	615	698	1305	1980	972	901	733	high	1	1	1	1	1	1	1	1	1	1207	1041	1158	634	1201	718	917	1124	442
32	1	1	1	1	1	1	1	1	1	977	821	706	917	670	580	1154	528	602	high	0	1	1	1	0	1	0	1	1	3025	1759	791	704	1538	2235	1945	800	1201
33	1	1	1	1	1	1	1	1	1	447	1060	1219	700	1511	753	760	862	800	high	1	0	1	1	1	1	1	1	1	1448	1775	1211	1960	2799	2705	1006	1965	2200
34	1	1	1	1	1	1	1	1	1	857	573	897	1118	613	927	1752	993	677	high	1	1	0	1	1	1	1	1	1	2363	1101	1053	1703	946	1176	714	817	706
35	1	1	1	1	1	1	1	1	1	1961	943	1160	625	1823	767	1256	1328	1937	high	1	1	1	0	1	1	1	1	1	1526	3112	1315	2242	2525	4052	1994	3216	557
36	1	1	1	1	1	1	1	1	1	1899	2088	756	763	703	1695	1047	992	864	high	1	1	1	1	0	0	1	1	1	1829	3009	1890	2475	2050	4725	2311	4830	554
37	1	1	1	1	1	1	1	1	1	807	664	739	653	565	2108	838	956	2347	high	1	1	1	1	1	1	1	1	1	2125	3536	2189	2586	1801	2114	1774	1804	1852
38	1	1	1	1	1	1	1	1	1	1762	823	685	721	1524	905	933	634	981	high	1	1	1	1	1	1	1	1	1	3624	912	764	1077	885	2775	2361	726	1309
39	1	1	1	1	1	1	1	1	1	2304	861	2167	1001	702	750	617	1176	1589	high	1	1	1	1	1	1	1	1	1	1765	1101	910	2562	1156	2743	849	690	2007
40	1	1	1	1	1	1	1	1	1	771	1830	710	808	899	735	968	644	719	high	1	1	1	1	1	0	1	0	1	2938	1760	3047	3152	1447	3315	800	2682	1156

## Sheet: 3
	Maintenance Dual Task
Sandwich Masking Task	ACC1	ACC2	ACC3	ACC4	ACC5	ACC6	ACC7	ACC8	ACC9	RT1	RT2	RT3	RT4	RT5	RT6	RT7	RT8	RT9	Working-memory Task	ACC_1	ACC_2	ACC_3	ACC_4	ACC_5	ACC_6	ACC_7	ACC_8	ACC_9	RT_1	RT_2	RT_3	RT_4	RT_5	RT_6	RT_7	RT_8	RT_9
1	1	1	1	1	1	1	1	1	1	338	470	508	351	482	1014	542	447	640	low	1	1	1	1	1	1	1	1	1	780	795	559	1804	576	636	669	491	602
2	1	1	1	1	1	1	1	1	1	585	444	514	308	497	340	489	463	761	low	1	1	1	1	1	1	1	1	1	779	603	469	866	584	507	897	682	620
3	1	1	1	1	1	1	1	1	1	488	398	314	454	364	438	391	436	915	low	1	1	1	1	1	1	1	1	1	996	613	532	1216	917	1026	884	981	676
4	1	1	1	1	1	1	1	1	1	434	370	626	810	627	445	400	450	354	low	1	1	1	1	1	1	1	1	1	506	762	444	666	576	542	871	1766	641
5	1	1	1	1	1	1	1	1	1	551	561	629	805	479	387	467	431	540	low	1	1	1	1	1	1	1	1	1	671	607	1178	511	718	501	889	823	889
6	1	1	1	1	1	1	1	1	1	471	497	526	539	462	452	404	396	394	low	1	1	1	1	1	1	1	1	1	800	677	629	599	1705	804	935	636	723
7	1	1	1	1	1	1	1	1	1	555	452	487	767	443	445	539	445	530	low	1	1	1	1	1	1	1	1	1	731	901	1987	591	354	1364	1971	672	609
8	1	1	1	1	1	1	1	1	1	541	538	442	609	544	554	491	547	342	low	1	1	1	1	1	1	1	1	1	656	762	1291	1271	553	467	532	484	984
9	1	1	1	1	1	1	1	1	1	540	459	497	518	778	698	536	563	579	low	1	1	1	1	1	1	1	1	1	478	826	1752	1218	1479	496	519	535	1269
10	1	1	1	1	1	1	1	1	1	485	703	357	416	464	646	821	493	690	low	1	1	1	1	1	1	1	1	1	451	652	502	572	381	1096	805	743	828
11	1	1	1	1	1	1	1	1	1	453	521	875	637	478	433	422	686	474	low	1	1	1	1	1	1	1	1	1	420	1007	1291	568	1399	1774	580	708	746
12	1	1	1	1	1	1	1	1	1	544	705	953	459	578	633	573	570	546	low	1	1	1	1	1	1	1	1	1	395	722	1553	610	453	777	1005	651	925
13	1	1	1	1	1	0	1	1	1	480	372	460	364	577	506	390	566	456	low	1	1	1	1	1	1	1	1	1	601	556	2645	623	375	1805	913	686	973
14	1	1	1	1	1	1	1	1	1	496	321	515	384	444	423	437	477	685	low	1	1	1	1	1	1	1	1	1	1047	738	1429	450	754	1457	585	1720	1166
15	1	1	1	1	1	1	1	1	1	582	379	319	407	514	555	455	701	428	low	1	1	1	1	1	1	1	1	1	618	414	4191	627	819	912	519	817	1671
16	1	1	0	1	1	1	1	1	1	445	362	534	489	392	425	545	504	778	low	1	1	1	1	1	1	1	1	0	545	1254	950	571	4545	817	497	1162	1327
17	1	1	0	1	0	0	1	1	1	361	320	373	388	354	407	346	356	430	low	1	1	1	1	1	1	1	1	0	640	760	1580	383	417	853	621	1293	1826
18	0	1	1	1	1	1	1	1	1	284	420	274	809	440	383	396	353	575	low	1	1	1	1	1	1	1	1	1	718	2469	744	974	710	495	685	593	2007
19	1	1	1	1	1	0	1	1	1	694	339	448	383	355	419	323	400	450	low	0	1	1	1	1	1	1	1	1	655	1095	645	806	727	2096	822	613	1158
20	1	1	0	1	1	1	1	1	1	400	485	695	343	500	378	429	876	537	low	1	1	1	1	1	1	1	1	1	967	557	557	582	535	538	402	384	4463
21	1	1	1	1	1	1	1	1	1	501	369	508	438	389	609	484	546	437	high	1	1	1	1	1	1	1	1	1	1401	2325	1243	2838	3743	2531	627	1334	3253
22	1	1	1	1	1	1	1	1	1	415	642	402	625	536	470	381	535	420	high	1	1	0	0	1	1	1	1	1	1794	3881	2224	2667	1684	2812	626	1697	1785
23	1	1	1	1	1	1	1	1	1	537	780	930	632	549	501	501	637	497	high	1	1	1	1	1	1	1	1	1	687	1137	731	661	1323	1959	1043	1048	2323
24	1	1	1	1	1	1	1	1	1	418	519	390	583	593	837	448	592	706	high	1	1	1	1	0	1	1	1	1	594	1000	2302	897	2664	1257	517	3230	2827
25	1	1	1	1	1	1	1	1	1	752	684	479	485	401	436	710	339	497	high	1	1	1	1	1	1	1	1	1	569	2200	1866	956	1383	2795	1230	3950	4222
26	1	1	1	1	1	1	1	1	1	610	638	693	1704	392	638	586	1408	447	high	1	1	1	1	0	1	1	1	1	1736	3126	1112	709	2783	3340	1539	4085	2980
27	1	1	1	1	1	1	1	1	1	486	488	488	642	869	405	488	716	523	high	1	1	1	1	1	1	1	1	1	1025	2426	1214	603	2313	1441	1275	3364	1493
28	1	1	1	1	1	1	1	1	1	1223	1085	523	481	502	863	533	610	545	high	1	1	1	1	1	1	1	1	1	1319	3157	2406	774	1002	2562	1662	2320	2386
29	1	1	1	1	1	1	1	1	1	2009	2231	1298	542	600	475	510	451	1272	high	1	1	1	1	1	1	1	1	1	554	3026	3581	992	992	1698	3610	1725	1436
30	1	1	1	1	1	1	1	1	1	719	949	675	433	1241	538	468	934	717	high	1	1	1	1	1	1	1	1	1	1391	758	1955	1842	2714	1039	3739	3625	1922
31	1	1	1	1	1	1	1	1	1	1747	958	1778	3284	3011	2282	819	928	626	high	1	1	1	1	1	1	1	0	1	1039	1793	2132	544	3030	1505	1310	2721	684
32	1	1	1	1	1	1	1	1	1	938	1330	1227	893	873	706	835	762	794	high	1	1	1	1	1	1	1	1	1	889	3317	1460	726	2088	1142	2308	2112	1199
33	1	1	1	1	1	1	1	1	1	673	1175	2919	534	799	1036	646	1171	449	high	1	1	1	1	1	1	1	1	1	1593	1586	837	779	3596	1254	2595	2363	1169
34	1	1	1	1	1	1	1	1	1	942	759	1005	1156	1747	1500	1172	694	591	high	1	1	1	1	1	1	1	1	1	2490	1863	765	592	980	3370	2634	2371	758
35	1	1	1	1	1	1	1	1	1	861	678	1216	642	1385	2075	1330	947	791	high	1	1	1	1	0	1	1	1	1	1973	1224	627	469	3864	1142	2843	3055	394
36	1	1	1	1	1	1	1	1	1	778	667	1007	787	570	606	533	538	488	high	1	1	1	1	1	1	1	1	1	723	2365	779	921	2696	677	2227	2131	789
37	1	1	1	1	1	1	1	1	1	438	498	383	533	363	378	411	493	420	high	1	1	1	1	1	1	1	1	1	954	1078	984	2065	2274	1112	3833	2023	1062
38	0	1	1	1	1	1	1	1	1	461	522	469	479	327	421	642	460	647	high	1	1	1	1	1	1	1	1	1	778	1418	759	2689	1152	523	2615	2083	2361
39	1	1	1	1	1	1	1	1	1	410	449	462	724	533	590	735	544	497	high	1	1	1	1	1	1	1	1	1	2371	2423	816	2469	2082	713	3319	2094	2006
40	1	1	1	1	1	1	1	1	1	455	396	405	483	493	476	520	355	674	high	1	1	1	1	1	1	1	1	1	1497	1023	747	1412	1321	1113	3058	1924	3232
	Manipulation Dual Task
Sandwich Masking Task	ACC1	ACC2	ACC3	ACC4	ACC5	ACC6	ACC7	ACC8	ACC9	RT1	RT2	RT3	RT4	RT5	RT6	RT7	RT8	RT9	Working-memory Task	ACC_1	ACC_2	ACC_3	ACC_4	ACC_5	ACC_6	ACC_7	ACC_8	ACC_9	RT_1	RT_2	RT_3	RT_4	RT_5	RT_6	RT_7	RT_8	RT_9
1	1	1	1	1	1	1	1	1	1	526	501	588	448	505	727	440	427	497	low	1	1	1	1	1	1	1	1	1	1152	754	1757	659	984	957	833	819	901
2	1	1	1	1	1	1	1	1	1	963	578	566	580	502	419	846	780	514	low	1	1	1	1	1	1	1	1	1	577	1060	1315	2032	880	986	714	1739	701
3	1	1	1	1	1	1	1	1	1	719	1431	466	1106	1051	967	616	428	529	low	1	1	1	1	1	1	1	1	1	1402	917	770	1045	1205	709	1193	562	1705
4	1	1	1	1	1	1	1	1	1	511	682	596	539	1342	521	383	598	491	low	1	1	1	1	1	1	1	1	1	1469	1298	2268	588	2346	1822	708	1885	1222
5	1	1	1	1	1	1	1	1	1	753	465	508	797	636	483	490	508	470	low	1	1	1	1	1	1	1	1	1	1061	1422	571	2026	1366	621	1614	1089	966
6	1	1	1	1	1	1	1	1	1	859	823	599	564	483	673	503	690	508	low	1	1	1	1	1	1	1	1	1	971	717	683	863	3052	769	1636	878	587
7	1	1	1	1	1	1	1	1	1	659	414	976	726	592	515	530	1208	644	low	1	1	1	1	1	1	1	1	1	2084	766	1102	2153	1645	747	1891	992	1357
8	1	1	1	1	1	1	1	1	1	471	355	548	381	374	621	607	775	383	low	1	1	1	1	1	1	1	1	1	1443	820	1116	1935	674	572	750	934	641
9	1	1	1	1	1	1	1	1	1	403	550	498	560	778	497	532	517	675	low	1	1	1	1	1	1	1	1	1	1198	716	1664	852	1347	852	1006	614	704
10	1	1	1	1	1	1	1	1	1	536	474	728	739	843	448	463	663	484	low	1	1	1	1	1	1	1	1	1	1110	1697	1187	578	764	851	1226	1862	738
11	1	1	1	1	1	1	1	1	1	695	677	457	612	826	516	980	346	976	low	1	1	1	1	1	1	1	1	1	1344	1173	1137	1273	1981	713	922	709	1939
12	1	1	1	1	1	1	1	1	1	685	469	546	521	534	471	629	402	497	low	1	1	1	1	1	1	1	1	1	681	1626	770	1153	698	2522	832	787	826
13	1	1	1	1	1	1	1	1	1	780	578	785	491	449	571	440	726	650	low	1	1	1	1	1	1	1	1	1	889	703	703	695	827	805	742	1502	2785
14	1	1	1	1	1	1	1	0	1	425	462	1169	498	1410	512	1035	1319	574	low	1	1	1	1	1	1	1	1	1	1522	790	877	1096	970	1102	662	1502	1561
15	1	1	1	1	1	1	1	1	1	568	589	551	375	475	990	662	602	557	low	1	1	1	1	1	1	1	1	1	851	1391	783	601	613	1560	1016	1189	1123
16	1	1	1	1	1	1	1	1	1	1005	748	1305	516	711	500	337	488	394	low	1	1	1	1	0	1	1	1	1	715	688	2181	780	726	730	619	2089	436
17	1	1	1	1	1	1	1	1	1	720	1261	525	532	650	778	658	541	486	low	1	1	1	1	1	1	1	1	1	727	1734	2076	1399	1305	1590	838	1600	750
18	1	1	1	1	1	1	1	1	1	1716	472	470	717	1185	641	1530	1268	672	low	1	1	1	1	1	1	1	1	1	2068	969	933	831	1437	1145	829	763	1043
19	1	1	1	1	1	1	1	1	1	707	556	477	383	642	375	706	503	447	low	1	1	1	1	1	1	1	1	1	2444	2033	2078	625	1799	684	2057	1812	859
20	1	1	1	1	1	1	1	1	1	631	613	1072	742	627	647	485	673	511	low	1	1	1	1	1	1	1	1	1	1954	1073	910	1802	1707	783	740	977	591
21	1	1	1	1	1	1	1	1	1	712	537	537	516	573	1672	366	434	609	high	1	1	1	1	1	1	1	1	1	986	736	693	1943	488	1621	607	519	652
22	1	1	1	1	1	1	1	1	1	487	1434	484	1075	646	541	654	658	403	high	1	1	1	1	1	1	1	1	1	724	678	605	1197	957	698	942	737	1130
23	1	1	1	1	1	1	1	1	1	488	365	1194	378	486	542	1651	505	432	high	1	1	1	1	1	1	1	1	1	1779	1039	1497	987	1519	1275	595	869	1277
24	1	1	1	1	1	1	1	1	1	687	596	372	444	518	559	525	391	547	high	1	1	1	1	0	1	1	0	1	1418	579	1841	681	439	1286	806	1259	746
25	1	1	1	1	1	1	1	1	1	795	545	773	600	1117	662	1878	656	526	high	1	1	0	1	1	1	1	1	1	1305	3116	2510	1043	1114	1541	2059	2495	1566
26	1	1	1	1	1	1	1	1	1	568	586	466	626	779	384	494	426	1205	high	1	1	1	1	1	1	1	1	1	1353	1997	743	2482	1855	1545	1576	1369	1825
27	1	1	1	1	1	1	1	1	1	929	587	1188	565	609	912	560	2192	1117	high	0	1	1	1	1	1	1	1	1	1162	2208	2652	1207	1137	2615	2713	1629	656
28	1	1	1	1	1	1	1	1	1	1637	686	562	939	1052	1315	645	994	689	high	1	1	1	1	0	1	1	0	1	1976	2730	1498	2351	2042	1481	2335	1907	1872
29	1	1	1	1	1	1	1	1	1	1616	812	732	762	858	572	746	894	531	high	0	1	1	0	1	1	1	1	1	4513	956	3321	2701	2099	2570	2015	2428	972
30	1	1	1	1	1	0	1	1	1	600	1277	2011	1809	945	1552	1234	706	587	high	1	1	1	1	1	1	1	1	1	2598	3189	1155	568	2725	1068	2675	1889	2418
31	1	1	1	1	1	1	1	1	1	1382	927	764	757	1475	533	685	501	544	high	1	1	1	1	1	1	1	1	1	991	2546	1716	3731	1222	2471	2319	1751	775
32	1	1	1	1	1	1	1	1	1	809	597	1908	2202	903	529	1491	1019	486	high	1	1	0	1	1	1	1	1	1	1547	2553	2259	1664	1778	1723	1583	913	841
33	1	1	1	1	1	1	1	1	1	771	965	620	908	506	579	828	1160	1384	high	1	1	1	1	0	1	1	1	1	2084	2370	2796	1716	1698	2233	2286	1612	1336
34	1	1	1	1	1	1	1	1	1	532	472	526	449	466	1277	474	879	843	high	1	1	1	1	1	1	0	1	1	939	1127	2629	1053	1238	1826	1137	2238	796
35	1	1	1	1	1	1	1	1	1	1081	652	1083	940	592	890	1029	1022	531	high	1	1	1	1	1	1	1	1	1	2240	2628	2836	2286	1219	912	1458	715	821
36	1	1	1	1	1	1	1	1	1	652	616	607	534	661	669	607	604	720	high	1	1	1	1	1	1	1	1	1	2093	876	1878	1017	1952	2036	1386	1072	960
37	1	1	1	1	1	1	1	1	1	820	531	626	490	819	519	875	811	1360	high	1	1	0	1	1	1	1	1	1	1708	1255	1365	1832	1240	2221	1448	3453	1352
38	1	1	1	1	1	1	1	1	1	573	648	601	976	776	494	750	459	625	high	1	1	1	1	1	1	1	0	1	1275	942	1830	2223	969	917	983	2150	1563
39	1	1	1	1	1	1	1	1	1	683	902	372	669	927	600	587	525	453	high	1	1	1	1	1	1	1	1	1	1399	2012	2176	999	1301	1370	1917	705	1495
40	1	1	1	1	1	1	1	1	1	621	377	1523	510	1297	554	786	660	1243	high	1	1	1	1	1	1	1	1	1	2528	786	3856	874	4146	1104	727	2317	1389

## Sheet: 4
	Maintenance Dual Task
Sandwich Masking Task	ACC1	ACC2	ACC3	ACC4	ACC5	ACC6	ACC7	ACC8	ACC9	RT1	RT2	RT3	RT4	RT5	RT6	RT7	RT8	RT9	Working-memory Task	ACC_1	ACC_2	ACC_3	ACC_4	ACC_5	ACC_6	ACC_7	ACC_8	ACC_9	RT_1	RT_2	RT_3	RT_4	RT_5	RT_6	RT_7	RT_8	RT_9
1	1	1	1	1	1	1	1	1	1	721	520	618	813	617	1053	1446	576	959	low	1	1	1	1	1	1	1	1	1	660	637	756	586	619	536	775	4895	508
2	1	1	1	1	1	1	1	1	1	484	1120	385	782	473	874	725	1019	458	low	1	1	1	1	1	1	1	1	1	606	656	827	661	622	648	659	703	740
3	1	1	1	1	1	1	1	1	1	1044	568	2495	656	972	791	622	925	1013	low	1	1	1	1	1	1	1	1	1	592	493	516	531	529	578	830	934	525
4	1	1	1	1	1	1	1	1	1	631	714	535	768	904	655	1782	630	671	low	1	1	1	1	1	1	1	1	1	526	567	693	532	506	612	650	619	532
5	1	1	1	1	1	1	1	1	1	703	1309	512	522	785	794	583	1689	689	low	1	1	1	1	1	1	1	1	1	756	988	805	598	555	579	779	895	465
6	1	1	1	1	1	1	1	1	1	563	802	769	488	603	693	993	898	1498	low	1	1	1	1	1	1	1	1	1	640	784	776	826	702	623	449	835	752
7	1	1	1	1	1	1	1	1	1	1687	842	740	637	685	728	1665	1387	889	low	1	1	1	1	1	1	1	1	1	710	768	744	986	1132	848	1463	877	540
8	1	1	1	1	1	1	1	1	1	551	3628	678	1190	623	988	1001	613	1037	low	1	1	1	1	1	1	1	1	1	744	1111	752	569	603	1324	807	676	564
9	1	1	1	1	1	1	1	1	1	426	295	503	552	486	490	298	571	1161	low	1	1	1	1	1	1	1	1	1	534	596	860	535	581	428	685	586	833
10	1	1	1	1	1	1	1	1	1	447	540	402	413	293	710	480	473	541	low	1	1	1	1	1	1	1	1	1	517	712	448	489	549	994	442	450	609
11	1	1	1	1	1	1	1	1	1	449	510	524	473	394	399	313	327	570	low	1	1	1	1	1	1	1	1	1	701	1275	840	585	905	3387	1139	1732	831
12	1	1	1	1	1	1	1	1	1	337	384	550	358	603	439	561	528	583	low	1	1	1	1	1	1	1	1	1	930	597	917	1383	1152	712	770	597	549
13	1	1	1	1	1	1	1	1	1	402	396	546	482	501	365	441	393	1465	low	1	1	1	1	1	1	1	1	1	933	828	868	661	611	560	672	1073	623
14	1	1	1	1	1	1	1	1	1	619	516	359	416	318	449	548	481	956	low	1	1	1	1	1	1	1	1	1	471	646	562	910	637	935	930	1225	1219
15	1	1	1	1	1	1	1	1	1	519	549	641	510	656	457	401	356	878	low	1	1	1	1	1	1	1	1	1	846	959	994	514	730	588	941	675	2380
16	1	1	1	1	1	1	1	1	1	477	414	520	896	481	415	481	433	910	low	1	1	1	1	1	1	1	1	1	799	608	528	778	2172	491	506	572	790
17	1	1	1	1	1	1	1	1	1	506	522	394	538	465	404	419	546	682	low	1	1	1	1	1	1	1	1	1	615	663	1147	936	563	642	658	891	701
18	1	1	1	1	1	1	1	1	1	324	710	562	415	387	489	959	412	745	low	1	1	1	1	1	1	1	1	1	589	474	591	475	557	491	506	689	679
19	1	1	1	1	1	1	1	1	1	450	545	776	451	382	518	459	366	1163	low	1	1	1	1	1	1	1	1	1	516	394	516	577	641	507	1134	870	613
20	1	1	1	1	1	1	1	1	1	545	1012	546	629	415	518	464	572	614	low	1	1	1	1	1	1	1	1	1	603	484	477	486	446	504	415	488	532
21	1	1	1	1	1	1	1	1	1	671	468	3599	510	639	611	712	360	577	high	1	1	1	1	1	1	1	1	1	2809	0	1025	4776	1436	3174	567	651	606
22	1	1	1	1	1	1	1	1	1	478	475	610	1124	415	665	537	381	1308	high	1	1	1	1	1	1	1	1	1	603	689	3280	796	589	725	551	718	591
23	1	1	1	1	1	1	1	1	1	4070	864	612	830	1555	570	1178	776	1079	high	1	1	1	1	1	1	1	1	0	584	570	740	683	539	1039	743	1987	696
24	1	1	1	1	1	1	1	1	1	993	852	766	1153	646	605	717	617	864	high	1	1	1	1	1	1	1	1	1	577	993	731	688	945	579	482	529	1229
25	1	1	1	1	1	1	1	1	1	1404	845	1993	1071	777	643	1751	1782	1110	high	1	1	1	1	1	1	1	1	1	730	522	973	608	444	1907	548	649	654
26	1	1	1	1	1	1	1	1	1	502	387	982	550	532	476	716	464	1693	high	1	1	1	1	1	1	1	1	1	551	469	533	517	534	717	392	938	653
27	1	1	1	1	1	1	1	1	1	599	1543	564	515	502	459	421	619	645	high	1	1	1	1	1	1	1	1	1	2108	1708	1164	1766	572	2125	697	467	1865
28	1	1	1	1	1	1	1	1	1	457	815	621	694	1081	673	882	512	664	high	1	1	1	1	1	1	1	1	1	2223	1376	2222	1935	1452	1382	1635	1171	1781
29	1	1	1	1	1	1	1	1	1	893	758	498	358	382	626	411	472	794	high	1	1	1	1	1	1	1	1	1	3178	2226	1306	2794	1850	1900	2855	1797	1042
30	1	1	1	1	1	1	1	1	1	347	574	648	480	488	416	344	482	770	high	1	1	1	1	1	1	1	1	1	2267	1985	1497	2091	1683	3841	1689	1891	1625
31	1	1	1	1	1	1	1	1	1	469	333	726	413	399	445	399	502	1135	high	1	1	1	1	1	1	1	1	1	1502	2772	3261	2604	1523	4482	2189	2561	4154
32	1	1	1	1	1	1	1	1	1	841	435	2404	819	397	465	501	915	680	high	1	1	1	1	1	1	1	1	1	2280	1953	2775	3149	1969	2414	2369	2097	1997
33	1	1	1	1	1	1	1	1	1	506	511	391	541	352	668	449	569	546	high	1	1	1	1	1	1	1	0	1	2180	1693	1393	3395	2402	1774	2130	2200	2566
34	1	1	1	1	1	1	1	1	1	449	481	463	401	518	448	343	370	852	high	1	1	1	1	1	1	1	1	1	2709	3324	2036	2144	1563	3815	2281	2442	638
35	1	1	1	1	1	1	1	1	1	428	457	361	2208	521	427	760	542	335	high	1	1	1	1	1	1	1	1	1	574	826	588	524	591	493	692	665	1354
36	1	1	1	1	1	1	1	1	1	437	953	1691	536	1076	678	507	1288	1025	high	1	1	1	1	1	1	1	1	1	843	569	1497	749	1119	2588	1502	1170	793
37	1	1	1	1	1	1	1	1	1	479	541	937	630	1660	788	643	1070	730	high	1	1	0	1	1	0	1	1	1	1914	955	3774	4068	3950	3325	3883	1434	1959
38	1	1	1	1	1	1	1	1	1	895	1318	1076	577	709	616	1707	601	597	high	1	1	0	0	1	1	1	1	1	4044	2288	1321	0	3059	4526	3316	2019	656
39	1	1	1	1	1	1	1	1	1	2140	1179	1083	600	817	516	629	406	1162	high	1	1	1	1	1	1	1	1	1	2126	1561	1280	2950	3242	2192	3653	2797	1961
40	1	1	1	1	1	1	1	1	1	512	607	841	587	527	738	626	1309	645	high	1	1	1	1	1	1	1	1	1	4121	2726	3259	1182	2138	2083	3105	1898	748
	Manipulation Dual Task
Sandwich Masking Task	ACC1	ACC2	ACC3	ACC4	ACC5	ACC6	ACC7	ACC8	ACC9	RT1	RT2	RT3	RT4	RT5	RT6	RT7	RT8	RT9	Working-memory Task	ACC_1	ACC_2	ACC_3	ACC_4	ACC_5	ACC_6	ACC_7	ACC_8	ACC_9	RT_1	RT_2	RT_3	RT_4	RT_5	RT_6	RT_7	RT_8	RT_9
1	1	1	1	1	1	1	1	1	1	544	512	409	773	542	464	467	800	508	low	1	1	1	1	1	1	1	1	1	850	875	1055	953	1755	676	1482	1475	1867
2	1	1	1	1	1	1	1	1	1	1367	549	586	586	425	358	461	1106	444	low	1	1	1	1	1	1	1	1	1	1355	754	1227	1901	1037	1888	820	692	791
3	1	1	1	1	1	1	1	1	1	1204	475	458	547	810	727	562	764	964	low	1	1	0	0	1	1	1	1	1	2321	1689	1082	2998	1896	682	811	1735	1434
4	1	1	1	1	1	1	1	1	1	626	817	386	1283	462	572	625	548	461	low	1	1	1	1	1	1	1	1	1	896	1613	1209	1157	1605	2013	899	1588	1309
5	1	1	1	1	1	1	1	1	1	451	537	965	456	488	391	437	383	392	low	1	1	1	1	1	1	1	1	1	1728	1053	899	754	2258	1013	3219	1095	1982
6	1	1	1	1	1	1	1	1	1	448	538	509	437	1256	500	749	1022	460	low	1	1	1	1	1	1	1	1	1	1749	856	761	661	1206	974	735	1732	908
7	1	1	1	1	1	1	1	1	1	602	626	1872	652	627	702	425	1053	564	low	1	1	1	1	1	1	1	1	1	1313	563	564	1275	762	453	1263	991	674
8	1	1	1	1	1	1	1	1	1	548	490	791	685	450	486	407	374	445	low	1	1	1	1	1	1	1	1	1	728	870	1146	738	812	734	1477	2413	1761
9	1	1	1	1	1	1	1	1	1	485	811	492	368	1239	434	364	416	395	low	1	1	1	1	1	1	1	1	1	1198	600	660	983	1406	1325	1680	677	1194
10	1	1	1	1	1	1	1	1	1	550	540	446	894	579	379	432	445	617	low	1	1	1	1	0	1	1	1	1	774	631	898	2073	2413	902	812	975	1519
11	1	1	1	1	1	1	1	1	1	546	489	478	467	445	434	404	444	366	low	1	1	1	1	1	1	1	1	1	1308	962	682	1095	1059	488	595	660	550
12	1	1	1	1	1	1	1	1	1	498	619	369	454	333	417	465	436	599	low	1	1	1	1	1	1	0	1	1	624	721	928	712	587	746	757	907	513
13	1	1	1	1	1	1	1	1	1	588	483	481	498	424	822	497	783	409	low	1	1	1	1	1	1	1	1	1	1446	1051	966	580	534	1626	799	2293	1137
14	1	1	1	1	1	1	1	1	1	473	366	482	539	577	423	429	445	455	low	1	1	1	1	1	1	1	1	1	679	1047	684	665	822	2814	1168	655	580
15	1	1	1	1	1	1	1	1	1	434	628	333	425	493	867	311	620	1231	low	1	1	1	1	1	1	1	1	1	1988	1028	1447	2730	2108	1522	691	1530	816
16	1	1	1	1	1	1	1	1	1	478	712	410	344	436	656	676	401	934	low	1	1	1	0	1	1	1	1	1	804	1553	1371	1666	1400	831	764	831	1783
17	1	1	1	1	1	1	1	1	1	672	435	565	420	523	415	438	404	460	low	1	1	1	1	1	1	1	1	1	394	2092	792	527	1973	1344	657	442	600
18	1	1	1	1	1	1	1	1	1	492	592	371	419	410	331	470	447	459	low	1	1	1	1	1	1	1	1	1	1304	2274	1818	1466	504	811	1118	1890	835
19	1	1	1	1	1	1	1	1	1	423	369	387	964	518	817	556	411	431	low	1	1	1	1	1	1	1	1	1	677	1983	1944	647	734	704	1092	2511	648
20	1	1	1	1	1	1	1	1	1	591	828	618	512	497	488	515	478	487	low	1	1	1	1	1	1	1	1	1	1824	889	1081	489	674	627	744	1585	1774
21	1	1	1	1	1	1	1	1	1	583	389	385	1151	1184	390	507	959	382	high	1	1	1	1	1	1	1	1	1	1382	726	1132	685	1264	704	691	637	652
22	1	1	1	1	1	1	1	1	1	541	639	1000	416	488	371	433	581	441	high	1	1	1	1	1	1	1	1	1	2800	1393	1891	593	1582	869	440	1208	1767
23	1	1	1	1	1	1	1	1	1	552	658	391	496	371	629	509	567	580	high	1	1	1	1	0	1	1	0	1	1244	1643	687	773	633	1362	1064	729	1808
24	1	1	1	1	1	1	1	1	1	622	1050	474	1888	595	644	448	458	679	high	1	1	1	1	1	1	1	1	1	544	906	733	1019	559	1161	1521	664	1666
25	1	1	1	1	1	1	1	1	1	475	419	502	340	545	338	433	337	459	high	1	1	1	1	0	1	1	1	1	784	539	900	458	1011	658	421	490	654
26	1	1	1	1	1	1	1	1	1	1039	472	437	569	528	464	563	400	646	high	1	1	1	1	1	1	0	0	1	696	693	1373	630	1851	893	623	1021	606
27	1	1	1	1	1	1	1	1	1	811	453	809	628	1044	385	487	719	520	high	1	1	1	0	1	1	1	1	1	1832	1475	1443	3050	2064	2563	2685	2671	2189
28	1	1	1	1	1	1	1	1	1	778	519	1086	621	1242	737	892	787	519	high	1	1	1	1	1	1	1	1	1	1003	949	1647	983	1951	2276	1307	983	1921
29	1	1	1	1	1	1	1	1	1	773	571	540	883	533	410	495	597	440	high	0	0	1	1	1	1	1	1	1	1086	3113	868	1117	1074	944	1352	1707	919
30	1	1	1	1	1	1	1	1	1	443	538	473	1372	381	531	417	537	405	high	0	1	0	1	1	1	1	1	1	644	967	1962	3422	932	1736	1772	846	2120
31	1	1	1	1	1	1	1	1	1	454	464	587	386	379	612	616	507	561	high	1	1	1	1	1	1	0	1	1	1114	1078	1193	1631	1462	1232	1066	2491	1334
32	1	1	1	1	1	1	1	1	1	436	412	1204	478	362	490	423	417	470	high	1	1	0	1	1	1	1	1	1	2655	1808	1739	942	1337	990	1205	1022	1215
33	0	1	1	1	1	1	1	1	1	0	608	331	460	1018	877	437	377	410	high	1	1	1	1	1	1	1	1	1	1971	1325	938	949	1261	1190	1061	1785	869
34	1	1	1	1	1	1	1	1	1	472	596	626	626	552	548	916	607	538	high	1	1	1	1	1	1	1	1	1	1713	967	987	1351	1876	1052	995	1154	940
35	1	1	1	1	1	1	1	1	1	378	510	417	659	565	472	481	445	454	high	1	1	1	1	1	1	1	0	1	961	1284	978	1121	1004	1952	1045	2670	2270
36	1	1	1	1	1	1	1	1	1	479	744	487	547	465	409	928	599	429	high	1	1	0	1	1	1	1	1	1	2015	928	1991	1581	1219	1750	993	935	919
37	1	1	1	1	1	1	1	1	1	607	438	641	1791	654	523	956	935	397	high	1	1	1	1	1	1	1	1	1	1127	915	2589	2217	1842	1965	1424	999	1881
38	1	1	1	1	1	1	1	1	1	598	438	533	1656	443	516	604	447	357	high	1	1	1	1	0	0	1	1	1	1472	1210	1583	1139	1007	1480	1739	1448	1324
39	1	1	1	1	1	1	1	1	1	1200	890	359	1547	496	1876	633	1483	1525	high	0	1	1	1	1	1	1	1	1	1220	983	1323	1163	2234	1851	1763	1712	1925
40	1	1	1	1	1	1	1	1	1	484	396	461	436	370	579	1459	375	890	high	1	1	1	1	1	1	1	0	1	1239	1410	1042	745	1324	1036	2228	1341	2069

## Sheet: 5
	Maintenance Dual Task
Sandwich Masking Task	ACC1	ACC2	ACC3	ACC4	ACC5	ACC6	ACC7	ACC8	ACC9	RT1	RT2	RT3	RT4	RT5	RT6	RT7	RT8	RT9	Working-memory Task	ACC_1	ACC_2	ACC_3	ACC_4	ACC_5	ACC_6	ACC_7	ACC_8	ACC_9	RT_1	RT_2	RT_3	RT_4	RT_5	RT_6	RT_7	RT_8	RT_9
1	1	1	1	1	1	1	1	1	1	386	419	698	594	756	487	453	1387	599	low	1	1	1	1	1	1	1	1	1	605	440	580	1072	574	477	542	681	394
2	1	1	1	1	1	1	1	1	1	506	515	396	425	498	379	526	871	459	low	1	1	1	1	1	1	1	1	1	681	406	466	712	422	515	735	597	532
3	1	1	1	1	1	1	1	1	1	564	413	461	423	722	471	392	560	768	low	1	1	1	1	1	1	1	1	1	790	516	419	528	589	629	578	620	703
4	1	0	1	1	1	1	1	1	1	511	416	395	493	511	665	530	531	431	low	1	1	1	1	1	1	1	1	1	586	453	500	501	552	1064	455	1672	469
5	1	1	1	1	1	0	1	1	1	353	541	483	511	539	419	726	470	674	low	1	1	1	1	1	1	1	1	1	354	635	1173	1102	1197	690	2141	610	789
6	1	1	1	1	1	1	1	1	1	501	430	573	1107	901	461	464	434	590	low	1	1	1	1	1	1	1	1	1	1175	1584	433	523	725	584	587	688	651
7	1	1	1	1	1	1	1	1	1	551	432	480	404	841	609	586	667	531	low	1	1	1	1	1	1	1	1	1	777	454	686	3860	563	1421	731	615	423
8	1	1	1	1	1	1	1	1	1	440	672	401	523	705	532	503	395	828	low	1	1	1	1	1	1	1	1	1	479	603	720	415	521	957	679	565	833
9	1	1	1	1	1	1	1	1	1	591	524	430	432	364	466	462	340	491	low	1	1	1	1	1	1	1	1	1	752	1031	585	504	1466	405	401	644	598
10	1	1	1	1	1	1	1	1	1	496	500	438	419	346	411	435	1599	517	low	1	1	1	1	1	1	1	1	1	570	607	460	423	564	348	473	602	1024
11	1	1	1	1	1	1	1	1	1	724	874	656	597	624	385	769	450	500	low	1	1	1	1	1	1	1	1	1	657	1280	903	2242	603	587	571	889	1289
12	1	1	1	1	0	1	1	1	1	828	774	1030	685	676	621	586	700	1215	low	1	1	1	1	1	1	1	1	1	657	665	616	715	814	714	928	665	2442
13	1	1	0	1	1	1	1	1	1	855	775	923	762	543	505	716	731	1835	low	1	1	1	1	1	1	1	1	1	2686	604	667	601	610	1086	543	1958	1150
14	1	1	1	1	1	1	1	1	1	670	610	773	779	716	1214	2410	675	571	low	1	1	1	1	1	1	1	1	1	976	2206	793	583	630	609	702	747	2128
15	1	1	1	1	1	1	1	1	1	781	748	1069	745	613	733	985	900	786	low	1	1	1	1	1	1	1	1	1	418	660	483	530	497	619	580	686	1162
16	1	1	1	1	1	1	1	1	0	665	1369	2514	694	1833	559	649	2278	777	low	1	1	1	1	1	1	1	1	1	671	642	425	788	684	645	1281	919	835
17	1	1	1	1	1	1	1	1	1	446	398	655	485	2396	1661	755	586	1069	low	1	1	1	1	1	1	1	1	1	458	727	838	967	522	786	695	687	610
18	1	0	1	1	1	1	1	1	1	526	879	62	662	447	1127	1387	2433	646	low	1	1	1	1	1	1	1	1	1	618	589	523	669	757	417	776	471	550
19	1	1	1	1	1	1	1	1	1	1089	1921	1059	2534	1677	1404	1410	2487	749	low	1	1	1	1	1	1	1	1	1	913	684	627	647	674	660	733	473	372
20	1	1	1	1	1	1	1	1	1	2289	641	1427	2423	1605	950	956	1326	2231	low	1	1	1	1	1	1	1	1	1	495	796	511	455	391	651	492	545	2782
21	1	1	1	1	1	1	1	1	1	2207	609	630	595	1054	831	1862	932	657	high	1	1	1	1	1	1	1	1	1	1202	871	710	2206	1319	2101	1125	1137	1971
22	1	1	1	1	1	1	1	1	1	1632	906	742	1548	1160	2358	970	715	632	high	1	1	1	1	1	1	1	1	1	1120	930	1576	883	961	910	1081	1065	779
23	1	1	1	1	1	1	1	1	1	1155	755	1345	1927	886	966	1457	586	1001	high	1	1	1	1	1	1	1	1	1	2206	1206	1620	1244	826	2127	2636	2346	1528
24	1	1	1	1	1	1	1	1	1	2098	580	1012	959	836	1646	1086	896	617	high	1	1	1	1	1	1	1	1	1	855	774	1074	1887	759	1101	918	1403	1647
25	1	1	1	1	1	1	1	1	1	1171	2524	2316	747	2234	554	1400	539	516	high	1	1	1	1	1	1	1	1	1	850	1110	908	1268	577	1918	1914	2232	1668
26	1	1	1	1	1	1	1	1	1	2767	1953	1019	1582	582	975	470	389	1645	high	1	1	1	1	1	1	1	1	1	2178	2110	1029	2547	1518	1962	1400	1548	948
27	1	1	1	1	1	1	1	1	1	519	2228	1932	541	1713	642	410	583	532	high	1	1	1	1	1	1	1	1	1	1651	688	1124	1497	1032	1668	1331	1806	2181
28	1	1	1	1	1	1	1	1	1	1300	419	1216	590	625	1450	1213	1429	984	high	1	1	1	1	1	1	1	1	1	1367	1949	1717	1046	1274	2702	2746	2142	1439
29	1	1	1	1	1	1	1	1	1	566	578	519	1604	1923	495	986	534	1513	high	1	1	1	1	1	1	1	1	1	1229	1431	1605	1543	3028	1369	1814	2259	1495
30	1	1	1	1	1	1	1	1	1	1679	577	799	1302	1556	909	970	696	698	high	1	1	1	1	1	1	1	1	1	1635	1338	2236	1776	1090	1500	2663	1528	830
31	1	1	1	1	1	1	1	1	1	1726	854	1141	629	767	1620	649	582	761	high	1	1	1	1	1	1	1	1	1	1535	2577	1958	1242	1485	857	1131	1060	1712
32	1	1	1	1	1	1	1	1	1	721	951	831	512	677	871	706	657	926	high	1	1	1	1	1	1	1	1	1	1387	1912	2885	2419	1791	928	1921	1571	2335
33	1	1	1	1	1	1	1	1	1	624	469	470	566	465	862	442	486	1074	high	1	1	1	1	1	1	1	1	1	1159	664	549	516	961	574	519	748	10
34	1	1	1	1	1	1	1	1	1	560	445	577	488	453	385	2330	676	339	high	1	1	1	1	1	1	1	1	1	691	490	740	1745	1871	2522	1512	2088	1072
35	1	1	1	1	1	1	1	1	1	446	374	461	411	442	607	618	527	504	high	1	1	1	1	1	1	1	1	1	1040	207	1072	1265	3008	2249	2020	2193	1815
36	1	1	1	1	1	1	1	1	0	978	405	292	449	477	553	378	623	447	high	1	1	1	1	1	1	1	1	1	1194	2893	3012	2447	1689	2687	2777	2116	1640
37	1	1	1	1	1	1	1	1	1	485	567	514	429	530	383	408	480	438	high	1	1	1	1	1	1	1	1	1	3260	2943	1929	2698	1797	2298	3070	3106	2382
38	1	1	1	1	1	1	1	1	1	351	467	403	367	386	477	390	482	381	high	1	1	1	1	1	1	1	1	1	1045	2473	1649	583	1538	1571	698	761	1157
39	1	1	1	1	1	1	1	1	1	666	557	551	410	564	358	445	403	466	high	1	1	1	1	1	1	1	1	1	940	1289	720	1251	538	647	534	875	1911
40	1	1	1	1	1	1	1	1	1	648	505	519	321	581	414	501	552	540	high	1	1	1	1	1	1	1	1	1	693	972	894	1440	1189	1069	747	727	963
	Manipulation Dual Task
Sandwich Masking Task	ACC1	ACC2	ACC3	ACC4	ACC5	ACC6	ACC7	ACC8	ACC9	RT1	RT2	RT3	RT4	RT5	RT6	RT7	RT8	RT9	Working-memory Task	ACC_1	ACC_2	ACC_3	ACC_4	ACC_5	ACC_6	ACC_7	ACC_8	ACC_9	RT_1	RT_2	RT_3	RT_4	RT_5	RT_6	RT_7	RT_8	RT_9
1	1	1	1	1	1	1	1	1	1	536	516	453	1200	461	391	518	572	472	low	1	0	1	1	1	1	1	1	1	461	1419	592	1135	758	1916	1160	1054	1023
2	1	1	1	1	1	1	1	1	1	1825	408	544	418	961	456	1477	432	370	low	1	1	1	1	1	1	1	1	1	694	1011	3021	516	1296	1184	1078	3042	813
3	1	1	1	1	1	1	1	1	1	762	465	622	1512	896	477	426	830	505	low	1	1	1	1	1	0	1	1	1	723	1919	2217	947	1041	1173	2354	1162	959
4	1	1	1	1	1	1	1	1	1	593	430	466	702	396	567	443	415	1074	low	1	1	1	1	1	1	1	1	1	939	1155	722	1146	748	1325	1933	957	973
5	1	1	1	1	1	1	1	1	1	543	417	1596	567	446	599	587	423	1011	low	1	1	1	1	1	1	1	1	1	558	610	497	861	661	464	512	928	511
6	1	1	1	1	1	1	1	1	1	833	473	666	607	482	452	582	708	477	low	1	1	1	1	1	1	1	1	1	650	539	489	521	537	571	657	661	533
7	1	1	1	1	1	1	1	1	1	477	526	663	476	543	598	500	674	370	low	1	1	1	0	1	1	1	1	1	640	706	574	554	567	547	742	629	545
8	1	1	1	1	1	1	1	1	1	498	386	435	471	1006	481	491	673	717	low	1	1	1	1	1	1	1	1	1	510	587	518	712	716	784	556	519	463
9	1	1	1	1	1	1	1	1	1	923	400	523	442	438	506	419	447	462	low	1	1	1	1	0	1	0	1	1	1016	720	561	897	430	1041	429	458	754
10	1	1	1	1	1	1	1	1	1	1416	587	1153	480	792	460	351	534	423	low	1	1	1	1	1	1	1	1	1	1020	473	822	751	510	909	725	533	650
11	1	1	0	1	1	1	1	1	1	464	432	462	481	613	518	467	432	620	low	1	1	1	1	1	1	1	1	1	692	1466	1108	1379	1352	1887	1549	617	981
12	1	1	1	1	1	1	1	1	1	383	391	489	502	479	583	801	405	1107	low	1	1	1	1	1	1	1	1	1	742	2060	744	2378	1285	1845	1779	2227	1230
13	1	1	1	1	1	1	1	1	1	370	397	328	362	421	476	378	522	461	low	1	1	1	1	1	1	1	1	1	456	405	614	479	659	533	464	581	517
14	1	1	1	1	1	1	1	1	1	495	392	487	669	483	496	580	413	555	low	1	1	1	1	1	1	1	1	1	385	798	845	617	1206	887	774	383	1281
15	1	1	1	1	1	1	1	1	1	380	375	390	420	452	634	429	488	415	low	1	1	1	1	0	0	1	0	1	466	881	494	507	507	630	767	731	852
16	1	1	1	1	1	1	1	1	1	339	360	392	468	399	507	418	456	351	low	1	1	1	1	1	1	1	1	1	340	483	796	857	369	1132	673	395	519
17	1	1	1	1	1	1	1	1	1	618	386	420	492	412	348	338	361	418	low	1	1	1	1	1	1	1	1	1	397	510	658	566	583	800	789	380	605
18	1	1	1	1	1	1	1	1	1	433	464	400	491	572	334	593	350	377	low	1	1	1	1	1	1	0	1	1	456	474	370	431	1082	451	554	468	429
19	1	1	1	1	1	1	1	1	1	570	1034	826	1599	918	619	1093	1094	621	low	1	1	1	1	1	1	0	1	1	996	2839	946	767	1352	1206	2278	706	1659
20	1	1	1	1	1	1	1	1	1	779	677	1957	1247	419	789	446	1131	453	low	1	1	1	1	1	1	1	1	1	1431	4297	673	968	1163	1050	2346	2025	781
21	1	1	1	1	1	1	1	1	1	587	777	455	459	603	457	431	689	410	high	1	1	1	1	1	1	1	1	1	1447	1372	775	1289	1349	1772	875	542	1604
22	1	1	1	1	1	1	1	1	1	324	975	558	549	430	422	459	392	418	high	1	1	1	1	1	1	1	1	1	2109	1118	1477	1627	1300	768	1415	1704	1162
23	1	1	1	1	1	1	1	1	1	341	529	417	606	437	837	436	699	434	high	1	1	1	1	1	1	1	1	1	2210	1271	1012	482	2746	1585	797	663	1138
24	1	1	1	1	1	1	1	1	1	476	363	580	529	972	397	491	349	340	high	1	1	1	1	1	1	1	1	1	2213	1001	1475	1039	2041	702	993	2289	527
25	1	1	1	1	1	1	1	1	1	432	407	453	387	451	729	550	527	352	high	1	1	1	1	1	1	1	1	1	2073	2060	1561	4534	3024	1243	1683	2247	1303
26	1	1	1	1	1	1	1	1	1	379	382	488	544	358	467	431	594	1019	high	1	1	1	1	1	1	1	1	1	1976	2071	1455	1387	1445	1317	2305	1291	1204
27	1	1	1	1	1	1	1	1	1	442	601	363	775	489	485	576	433	596	high	1	1	0	1	1	1	1	0	1	2195	2103	1336	1721	1927	1522	1275	768	1768
28	1	1	1	1	1	1	1	1	1	437	413	1395	436	421	611	566	329	688	high	1	1	1	1	1	1	1	1	1	1758	1664	1050	1366	1360	3036	2003	2717	1305
29	1	1	1	1	1	1	1	1	1	1261	625	527	596	565	499	506	890	727	high	0	1	1	1	1	1	1	1	1	4225	3000	2403	1239	2920	3093	1462	1177	1675
30	1	1	1	1	1	1	1	1	1	496	770	570	589	556	526	2342	477	1534	high	1	1	1	1	1	1	1	1	1	2139	1586	1612	1566	1665	2971	1650	1575	1459
31	1	1	1	1	1	1	1	1	1	878	790	1281	1413	874	1071	654	513	469	high	1	1	1	1	1	1	1	1	1	2036	1761	2280	2780	2040	1937	4602	2080	4025
32	1	1	1	1	1	1	1	1	1	374	665	415	608	1075	562	527	781	505	high	1	1	1	1	1	1	1	1	1	1484	2332	2070	1613	1322	1864	1619	1835	1505
33	1	1	1	1	1	1	1	1	1	547	1272	419	495	647	411	556	639	511	high	1	1	1	1	1	1	1	1	1	2769	1609	2962	1794	1569	3980	2419	2321	1543
34	1	1	1	1	1	1	1	1	1	718	813	615	942	911	802	404	482	657	high	1	1	1	1	1	1	1	1	1	1618	1572	1662	1544	3383	1163	1701	1940	920
35	1	1	1	1	1	1	1	1	1	596	490	379	412	585	428	1965	1036	519	high	1	1	1	1	1	0	1	1	1	1533	3651	2618	1591	2090	1833	1575	1624	1978
36	1	1	1	1	1	1	1	1	1	492	352	623	606	879	393	484	559	460	high	1	1	1	1	1	1	1	1	1	2168	1843	1643	2913	2113	1439	1199	3608	755
37	1	1	1	1	1	1	1	1	1	700	473	407	815	494	513	450	509	1490	high	1	1	1	1	1	1	1	1	1	1909	1502	1052	3233	2355	1111	3079	1442	1455
38	1	1	1	1	1	1	1	1	1	868	427	676	487	509	715	541	973	599	high	1	1	1	1	1	1	1	1	1	1457	1295	2386	1519	2244	1397	923	1701	2932
39	1	1	1	1	1	1	1	1	1	610	519	443	687	478	420	416	485	560	high	1	1	1	1	1	1	1	1	1	1665	1584	1674	1938	2146	2469	3768	1040	1254
40	1	1	1	1	1	1	1	1	1	558	403	451	571	570	396	479	397	409	high	1	1	1	1	1	1	1	1	1	2161	1871	3930	2785	1739	1683	2531	2336	1004

## Sheet: 6
	Maintenance Dual Task
Sandwich Masking Task	ACC1	ACC2	ACC3	ACC4	ACC5	ACC6	ACC7	ACC8	ACC9	RT1	RT2	RT3	RT4	RT5	RT6	RT7	RT8	RT9	Working-memory Task	ACC_1	ACC_2	ACC_3	ACC_4	ACC_5	ACC_6	ACC_7	ACC_8	ACC_9	RT_1	RT_2	RT_3	RT_4	RT_5	RT_6	RT_7	RT_8	RT_9
1	1	1	1	1	1	1	1	1	1	772	621	548	570	696	526	602	654	719	low	1	1	1	1	1	1	1	1	1	415	605	453	378	434	574	737	507	402
2	1	1	1	1	1	1	1	1	1	541	658	514	535	507	608	664	640	518	low	1	1	1	1	1	1	1	1	1	554	434	342	512	689	575	587	551	613
3	1	1	1	1	1	1	1	1	1	453	653	508	693	698	513	595	918	937	low	1	1	1	1	1	1	1	1	1	451	543	457	547	510	470	1113	665	532
4	1	1	1	1	1	1	1	1	1	570	570	540	542	697	484	628	722	675	low	1	1	1	1	1	1	1	1	1	427	1384	531	410	516	645	544	573	519
5	1	1	1	1	1	1	1	1	1	965	727	627	549	451	546	498	646	758	low	1	1	1	1	1	1	1	1	1	454	596	1077	778	450	625	1007	523	616
6	1	1	1	1	1	1	1	1	1	862	539	628	833	599	636	614	540	494	low	1	1	1	1	0	1	1	1	1	408	448	1022	504	448	556	435	560	889
7	1	1	1	1	1	1	1	1	1	636	540	443	643	534	1105	516	658	645	low	1	1	1	1	1	1	1	1	1	345	549	695	596	461	420	660	661	611
8	1	1	1	1	1	1	1	1	1	601	461	743	576	661	738	864	680	923	low	1	1	1	1	1	1	1	1	1	448	656	659	741	711	980	744	515	693
9	1	1	1	1	1	1	1	1	1	892	593	701	495	710	443	514	697	578	low	1	1	1	1	1	1	1	1	1	718	754	1058	491	435	626	624	689	608
10	1	1	1	1	1	1	1	1	1	579	684	527	479	828	540	522	747	774	low	1	1	0	1	1	1	1	1	1	440	1082	515	410	633	916	710	629	1028
11	1	1	1	1	1	1	1	1	1	562	483	618	657	715	571	527	558	580	low	1	1	1	1	1	1	1	0	0	623	443	890	605	608	1762	2782	0	0
12	1	1	1	1	1	1	1	1	1	690	605	611	431	512	544	477	543	660	low	1	1	1	1	1	1	1	1	1	2226	1981	908	990	1044	748	740	416	978
13	1	1	1	1	1	1	1	1	1	595	631	569	536	542	713	425	838	552	low	1	1	1	1	1	1	1	1	1	1619	615	985	704	1628	857	738	614	850
14	1	1	1	1	1	1	1	1	1	513	598	497	462	464	561	578	963	733	low	1	1	1	1	1	1	1	1	1	1090	1266	861	1625	1121	1196	1424	677	750
15	1	1	1	1	1	1	1	1	1	508	470	458	852	940	653	474	569	798	low	1	1	1	1	1	1	1	1	1	895	1744	1094	1351	1685	1117	1127	783	1076
16	1	1	1	1	1	1	1	1	1	691	394	568	633	947	859	601	848	491	low	1	1	1	1	1	1	1	1	1	1068	724	782	893	924	1474	1514	1688	1053
17	1	1	1	1	0	1	1	1	1	790	797	743	2080	973	2110	942	645	527	low	1	1	1	1	1	1	1	1	1	363	455	1302	968	453	850	831	577	1145
18	1	1	1	1	1	1	1	1	1	504	684	655	509	778	922	707	916	549	low	1	1	1	1	1	1	1	0	1	553	1171	931	832	761	1188	1648	1378	413
19	1	1	1	1	1	1	1	1	1	486	440	1111	438	498	734	577	577	529	low	1	1	1	1	1	1	1	1	1	577	580	499	415	510	1109	700	1011	627
20	1	1	1	1	1	1	1	1	1	562	469	502	401	550	416	561	745	402	low	1	1	1	1	1	1	1	1	0	810	571	456	1087	1276	457	805	933	0
21	1	1	1	1	1	1	1	1	1	405	368	579	651	353	529	440	702	514	high	1	1	1	1	1	1	1	1	1	1030	582	824	767	707	980	704	1737	744
22	1	1	0	1	1	1	1	1	1	495	930	3199	590	402	566	687	628	505	high	1	1	1	1	1	1	1	1	1	460	471	491	486	506	477	898	651	512
23	1	1	1	1	1	1	1	1	1	761	657	633	806	452	760	686	547	515	high	1	1	1	1	1	1	1	1	1	614	550	851	446	617	570	571	597	582
24	1	1	1	1	1	1	1	1	1	407	556	1109	667	517	850	414	2299	438	high	1	1	1	1	1	1	1	1	1	566	566	592	460	522	629	440	627	564
25	1	1	1	1	1	1	1	1	1	905	1273	557	427	772	686	628	719	610	high	1	1	1	1	1	1	1	1	1	1918	799	1059	1548	597	1165	681	2675	719
26	1	1	1	1	1	1	1	0	1	415	799	411	724	512	516	1085	762	570	high	1	1	1	1	1	1	1	1	1	1097	868	1138	795	1498	719	557	1140	503
27	1	1	1	1	1	1	1	1	1	595	521	438	582	555	496	740	841	521	high	1	1	1	1	1	1	1	1	1	588	824	1639	1321	877	734	1236	832	869
28	1	1	1	1	1	1	1	1	1	611	606	669	648	342	569	555	675	549	high	1	1	1	1	1	1	1	1	1	650	1047	1161	728	870	1402	1081	694	1010
29	1	1	1	1	1	1	1	1	1	443	578	644	2544	464	872	578	790	896	high	1	1	1	1	1	1	1	1	1	2291	3052	2728	2297	2098	4538	1689	1044	3378
30	1	1	1	1	1	1	1	1	1	776	936	1314	406	919	738	682	606	1248	high	1	1	1	1	1	1	1	1	1	3294	2245	2646	2470	2470	3407	2413	1741	2042
31	1	1	1	1	1	1	1	0	1	813	725	628	833	1053	1204	691	1515	1686	high	0	1	1	0	1	1	1	0	1	3885	2906	2443	0	2284	4802	3404	0	1182
32	1	1	1	1	1	1	1	1	1	849	494	737	577	495	508	771	961	691	high	1	1	0	1	1	1	1	1	1	2913	2784	2207	2791	3251	3822	3158	3225	762
33	1	1	1	1	1	1	1	1	1	1056	917	838	903	742	628	653	1006	1401	high	1	1	1	1	1	1	0	1	1	4049	2183	3602	2176	1563	2979	4935	3584	1087
34	1	1	1	1	1	1	1	1	1	799	843	782	1265	763	667	877	1265	1161	high	1	1	1	1	1	0	1	1	1	2995	2946	2384	2424	1229	0	2520	2107	1099
35	1	1	1	1	1	1	1	1	1	602	873	741	788	653	611	598	602	493	high	1	1	1	1	1	1	1	1	1	2644	2855	1495	3285	2797	2355	2652	2387	797
36	1	1	1	1	1	1	1	1	1	636	692	735	710	486	487	1076	1135	959	high	1	1	1	1	1	1	1	1	1	1550	3166	2071	2975	1662	2790	2029	2563	1266
37	1	1	1	1	1	1	1	1	1	747	696	831	698	889	659	719	1066	829	high	1	1	1	1	1	1	1	1	1	2190	3138	4423	2930	2784	4646	3999	3039	4184
38	1	1	1	1	1	1	1	1	1	583	492	610	733	529	662	686	685	1102	high	1	1	1	1	1	1	1	1	1	2663	2522	2792	2824	2873	2723	3631	1935	2546
39	1	1	1	1	1	1	1	1	1	690	1184	510	565	434	483	465	696	521	high	1	1	1	1	1	1	1	1	1	4855	4254	2121	3954	3965	2730	3245	2723	1917
40	1	1	1	1	1	1	1	1	1	629	549	638	444	557	673	634	671	799	high	1	1	1	1	1	1	1	1	1	2744	2524	3132	4484	3315	2928	3603	4158	3174
	Manipulation Dual Task
Sandwich Masking Task	ACC1	ACC2	ACC3	ACC4	ACC5	ACC6	ACC7	ACC8	ACC9	RT1	RT2	RT3	RT4	RT5	RT6	RT7	RT8	RT9	Working-memory Task	ACC_1	ACC_2	ACC_3	ACC_4	ACC_5	ACC_6	ACC_7	ACC_8	ACC_9	RT_1	RT_2	RT_3	RT_4	RT_5	RT_6	RT_7	RT_8	RT_9
1	1	1	1	1	1	1	1	1	1	969	944	497	542	463	1018	352	479	583	low	1	1	1	1	1	1	1	1	1	727	1228	686	1275	1654	1689	434	525	666
2	1	1	1	1	1	1	1	1	1	323	399	363	345	332	534	466	489	500	low	1	1	1	1	1	1	1	1	1	629	491	595	494	631	373	812	518	1992
3	1	1	1	1	1	1	1	1	1	494	931	616	497	515	591	564	512	492	low	1	1	1	1	1	1	1	1	1	875	829	1035	484	629	667	722	1111	590
4	1	1	1	1	1	1	1	1	1	598	552	498	510	574	581	510	682	1037	low	1	1	1	1	1	1	1	1	1	616	660	553	566	683	848	916	1096	732
5	1	1	1	1	1	1	1	1	1	640	609	512	378	437	524	521	495	597	low	1	1	1	1	1	1	1	1	1	711	977	625	594	582	723	1489	1234	1056
6	1	1	1	1	1	1	1	1	1	522	675	459	631	413	368	415	903	409	low	1	1	1	1	1	1	1	1	1	486	704	764	1202	631	884	968	583	1228
7	1	1	1	1	1	1	1	1	1	423	764	697	533	575	494	621	581	527	low	1	1	1	1	1	1	1	1	1	1803	699	694	815	601	699	531	656	599
8	1	1	1	1	1	1	1	1	1	661	616	636	1308	431	701	425	481	638	low	1	1	1	0	1	1	1	1	1	606	409	1692	564	766	447	644	627	741
9	1	1	1	1	1	1	1	1	1	529	599	699	658	571	964	551	441	538	low	1	1	1	1	1	1	1	1	1	1261	684	645	946	579	431	590	1731	870
10	1	1	1	1	1	1	1	1	1	617	568	317	330	394	545	492	461	562	low	1	1	1	1	1	1	1	1	1	1639	591	515	569	562	728	1040	697	861
11	1	1	1	1	1	1	1	1	1	499	551	472	427	534	617	400	657	546	low	1	1	1	1	1	1	1	1	1	655	516	777	478	382	902	508	1370	1715
12	1	1	1	1	1	1	1	1	1	531	882	582	531	538	329	630	557	487	low	1	1	1	1	1	1	1	1	1	412	1003	715	787	947	410	573	674	567
13	1	1	1	1	1	1	1	1	1	1329	595	435	589	557	804	787	501	1604	low	1	1	1	1	1	1	1	1	1	577	504	587	1141	506	673	695	639	673
14	1	1	1	1	1	1	1	1	1	557	449	609	679	598	515	605	558	584	low	1	1	1	0	1	1	1	1	1	389	743	2274	508	516	579	782	606	1628
15	1	1	1	1	1	1	1	1	1	585	509	775	746	1047	543	426	609	521	low	1	1	1	1	1	1	1	1	1	1913	1023	865	1060	1001	682	2105	1093	1729
16	0	1	1	1	1	1	1	1	1	0	1326	999	449	688	461	627	1084	560	low	1	1	1	1	1	1	1	1	1	1670	2077	807	1035	3114	706	1830	953	2320
17	1	1	1	1	1	1	1	1	1	746	1196	660	639	2345	1971	1092	537	681	low	1	1	1	1	1	1	1	1	1	945	2687	2067	2764	2502	2133	1089	2299	960
18	1	1	1	1	1	1	1	1	1	1920	1773	784	547	490	795	2094	610	1176	low	1	1	1	1	1	1	1	1	1	3576	990	1587	3629	1313	957	1720	2157	1871
19	1	1	1	1	1	1	1	1	1	1175	586	2113	1182	1626	914	636	1239	546	low	1	1	1	1	1	1	1	1	1	2672	1310	1571	1108	1338	2032	906	1754	854
20	1	1	1	1	1	1	1	1	1	1863	824	1192	1965	571	753	1108	1188	596	low	1	0	1	1	1	1	1	1	1	2221	2420	2089	890	2200	1221	2353	2754	522
21	1	1	1	1	1	1	1	1	1	601	477	796	1069	450	995	646	359	968	high	1	1	1	1	1	1	1	1	1	960	890	2527	1742	912	2050	1191	942	1895
22	1	1	1	1	1	1	1	1	1	1300	1328	825	466	669	696	406	485	552	high	1	1	1	1	1	1	1	1	1	1216	1829	1445	1488	1057	1620	1927	1040	1571
23	1	1	1	1	1	1	1	1	1	483	544	1707	799	1051	516	461	2308	606	high	1	1	1	1	0	1	1	1	1	2193	977	1196	1493	1414	2378	1225	2236	708
24	1	1	1	1	1	1	1	1	1	662	963	574	538	746	1640	517	595	548	high	1	1	1	1	0	1	1	1	1	1753	3421	1066	2466	1472	2807	1225	2068	847
25	1	1	1	1	1	1	1	1	1	761	501	1290	859	727	1817	522	511	518	high	1	0	1	1	1	1	1	1	1	944	2170	2726	1063	1803	1019	928	1343	706
26	1	1	1	1	1	1	1	1	1	617	957	490	552	861	1444	675	1280	837	high	0	1	1	1	1	1	1	1	1	1004	2621	1104	2657	3374	2302	1649	1703	1474
27	1	1	1	1	1	1	1	1	1	634	1553	703	958	1704	630	925	823	786	high	1	1	1	1	1	1	1	1	1	1806	2440	1453	2406	1194	1101	2243	1544	1280
28	1	1	1	1	1	1	1	1	1	1184	730	602	1305	581	566	1260	542	932	high	1	1	1	1	1	1	1	1	1	827	1832	1672	844	933	2438	1022	900	2494
29	0	1	1	1	1	1	1	1	1	0	754	525	650	599	523	1035	643	780	high	1	1	1	1	1	1	1	1	1	3505	1463	1501	1397	2180	855	1750	1322	1808
30	1	1	1	1	1	1	1	1	1	807	930	489	506	1340	389	651	1017	996	high	1	1	1	1	1	1	1	1	1	1386	1916	829	1306	1892	983	1716	1914	2745
31	1	1	1	1	1	1	1	1	1	531	573	364	427	540	430	404	509	432	high	1	0	1	1	1	1	1	1	1	2742	638	753	694	661	1148	553	487	1459
32	1	1	1	1	1	1	1	1	1	515	613	624	904	469	677	590	1306	484	high	1	1	1	1	1	1	1	1	1	652	1023	1051	1434	512	1039	572	625	780
33	1	1	1	1	1	1	1	1	1	466	601	703	442	629	530	546	608	1120	high	1	1	1	1	1	1	1	1	1	703	2432	607	594	706	586	861	1144	1010
34	1	1	1	1	1	1	1	1	1	430	592	585	1297	518	755	400	640	546	high	1	1	1	1	0	1	1	1	1	790	759	1537	1086	1267	646	692	826	1322
35	1	1	1	1	1	1	1	1	1	681	611	1460	422	2008	463	364	526	396	high	1	1	1	1	1	1	1	1	1	777	813	1508	849	650	684	671	515	613
36	1	1	1	1	1	1	1	1	1	644	523	609	917	492	481	385	762	473	high	1	1	1	1	1	1	0	1	1	789	831	677	806	579	543	744	1597	594
37	1	1	1	1	1	1	1	1	1	434	389	561	551	511	517	500	601	382	high	1	1	1	1	1	1	1	1	1	644	522	1287	617	550	798	663	660	624
38	1	1	1	1	0	1	1	1	1	594	367	932	563	944	427	597	531	556	high	1	1	1	1	1	1	1	1	1	1062	1051	2210	879	792	595	1275	612	609
39	1	1	1	1	1	1	1	1	1	555	595	531	557	857	531	551	1090	655	high	1	1	1	1	1	1	1	1	1	729	612	613	2613	803	629	915	1522	1402
40	1	1	1	1	1	1	1	1	1	521	566	354	408	437	473	321	489	663	high	1	1	1	1	1	1	1	0	1	653	699	654	634	772	627	635	810	925

## Sheet: 7
	Maintenance Dual Task
Sandwich Masking Task	ACC1	ACC2	ACC3	ACC4	ACC5	ACC6	ACC7	ACC8	ACC9	RT1	RT2	RT3	RT4	RT5	RT6	RT7	RT8	RT9	Working-memory Task	ACC_1	ACC_2	ACC_3	ACC_4	ACC_5	ACC_6	ACC_7	ACC_8	ACC_9	RT_1	RT_2	RT_3	RT_4	RT_5	RT_6	RT_7	RT_8	RT_9
1	1	1	1	1	1	1	1	1	1	513	478	474	526	384	424	673	479	571	low	1	1	1	1	1	1	1	1	1	1099	815	2092	1611	528	1771	1161	808	1111
2	1	1	1	1	1	1	1	1	1	648	522	492	1588	1071	492	512	471	594	low	1	0	1	1	1	1	1	1	1	518	840	2488	1351	551	829	3273	1890	969
3	1	1	1	1	1	1	1	1	1	551	515	556	499	479	644	496	954	428	low	1	1	1	1	1	1	1	1	1	582	1033	637	647	788	628	1704	1465	531
4	1	1	1	1	1	1	1	1	1	420	547	469	461	701	446	458	620	418	low	1	1	1	1	1	1	1	1	1	821	1154	1559	948	1557	817	1353	1286	3092
5	1	1	1	1	1	1	1	1	1	706	515	516	486	435	543	504	511	855	low	1	1	1	1	1	1	1	1	1	544	445	1258	789	1116	524	443	654	692
6	1	1	1	1	1	1	1	1	1	463	481	505	489	405	465	456	454	512	low	1	1	1	1	1	1	1	1	1	515	939	771	740	2603	815	854	1427	1017
7	1	1	1	1	1	1	1	1	1	552	610	451	396	529	617	739	627	481	low	1	1	1	1	0	1	1	1	1	536	1555	923	780	922	1169	605	1293	1087
8	1	1	1	1	1	1	1	1	1	561	382	418	405	503	466	500	476	444	low	1	1	1	1	1	1	1	1	0	1099	998	2394	755	728	1654	889	865	3204
9	1	1	1	1	1	1	1	1	1	501	567	391	727	506	690	648	691	729	low	0	1	1	1	1	1	1	1	1	1512	620	1211	792	731	2577	722	695	969
10	1	1	1	1	1	1	1	1	1	503	431	1131	675	879	1713	475	466	603	low	1	1	1	1	1	1	1	1	1	711	629	1311	747	791	953	596	1084	570
11	1	1	1	1	1	1	1	1	1	438	578	466	566	764	491	416	984	489	low	1	1	1	1	1	1	1	1	1	1073	1093	941	639	1169	685	1742	665	814
12	1	1	1	1	1	1	1	1	1	583	913	444	513	563	544	524	516	479	low	1	1	1	1	1	1	1	1	1	650	2049	1197	995	716	1657	648	808	531
13	1	1	1	1	1	1	1	1	1	483	589	562	496	613	696	544	404	654	low	1	1	1	1	1	1	1	1	1	1147	544	1006	658	1933	2386	1236	683	805
14	1	1	1	1	1	1	1	1	1	523	472	668	588	807	766	535	603	823	low	1	1	1	1	1	1	1	1	1	450	1312	681	1518	1547	703	685	1085	580
15	1	1	1	1	1	1	1	1	1	447	483	482	626	544	503	412	495	550	low	1	1	1	1	1	1	0	1	1	629	2268	1451	2187	981	480	2079	521	860
16	1	1	1	1	1	1	1	1	1	512	469	495	439	463	529	564	575	405	low	1	1	1	1	1	1	1	1	1	882	3340	1277	1103	720	2393	1062	1418	614
17	1	1	1	1	1	1	1	1	1	495	507	368	506	366	490	591	489	437	low	0	1	1	1	1	1	1	1	1	4280	1435	1021	1513	2678	1470	574	2147	1613
18	1	1	1	1	1	1	1	1	1	429	597	502	524	553	441	480	671	703	low	1	1	1	1	1	1	1	1	1	923	808	787	2072	475	731	1184	590	740
19	1	1	1	1	1	1	1	1	1	483	542	406	555	478	525	427	456	481	low	1	1	1	1	1	1	1	1	1	2346	745	1805	735	1451	630	946	731	622
20	1	1	1	1	1	1	1	1	1	521	412	578	454	468	403	541	433	588	low	1	1	1	1	1	1	1	1	1	3560	3548	2526	3406	547	824	620	2482	877
21	1	1	1	1	1	1	1	1	1	626	577	603	544	619	598	672	433	671	high	1	1	1	1	1	1	1	1	1	1103	549	595	424	715	2353	452	411	706
22	1	1	1	1	1	1	1	1	1	468	469	458	559	531	516	506	531	622	high	1	1	1	1	1	1	1	1	1	995	1738	1643	638	669	642	949	705	3249
23	1	1	1	1	1	1	1	1	1	544	511	453	518	795	635	424	510	529	high	1	1	1	1	1	1	1	1	1	1284	1847	1078	2175	704	1470	1677	2093	3321
24	1	1	1	1	1	1	1	1	1	768	416	483	485	538	782	728	611	709	high	1	0	1	1	1	1	1	1	1	2360	3006	703	631	4668	1888	949	710	1311
25	1	1	1	1	1	1	1	1	1	506	711	631	460	461	408	491	441	613	high	1	1	1	1	1	1	1	1	0	856	691	1861	1842	1636	764	1660	2647	1016
26	1	1	1	1	1	1	1	1	1	490	770	534	478	524	464	1019	580	519	high	1	1	1	1	1	0	1	1	1	1174	1479	807	599	2174	2395	818	2072	848
27	1	1	1	1	1	1	1	1	1	479	452	485	534	477	546	557	661	408	high	1	1	1	1	1	1	1	1	1	2002	675	663	789	765	1135	832	1038	604
28	1	1	1	1	1	1	1	1	1	717	615	471	630	440	545	442	489	531	high	1	1	1	1	1	1	1	1	1	1095	1081	746	946	802	1138	1547	1316	684
29	1	1	1	1	1	1	1	1	1	485	1319	574	503	472	630	634	442	615	high	1	1	1	1	1	1	1	1	1	1833	762	3048	1178	746	1181	2120	1821	664
30	1	1	1	1	1	1	1	1	1	425	493	518	505	472	435	418	1033	484	high	1	1	1	0	1	1	1	1	1	1173	1521	1831	968	4126	1104	747	1020	730
31	1	1	1	1	1	1	1	1	1	440	492	526	516	490	434	503	422	537	high	1	1	1	1	1	1	1	1	1	1171	1948	1265	768	1011	698	740	906	486
32	1	1	1	1	1	1	1	1	1	531	674	487	458	488	439	373	518	406	high	1	1	1	1	1	0	1	1	1	3176	927	3044	1673	1742	2030	1786	827	1005
33	1	1	1	1	1	1	1	1	1	456	426	464	399	581	537	549	465	467	high	1	1	1	1	1	1	1	1	1	1446	3572	1538	1811	1566	1047	1417	2393	1487
34	1	1	1	1	1	1	1	1	1	410	459	745	442	570	423	440	441	476	high	1	1	1	1	1	1	1	1	1	1386	670	746	529	3331	1397	2567	817	1234
35	1	1	1	1	1	1	1	1	1	491	988	471	484	1144	572	511	920	416	high	1	1	1	1	1	1	1	1	1	1529	936	1822	581	937	1682	955	1050	660
36	1	1	1	1	1	1	1	1	1	744	611	687	586	597	479	482	1301	460	high	1	1	1	1	1	0	1	1	1	1818	997	732	981	1044	559	802	464	598
37	1	1	1	1	1	1	1	1	1	642	378	470	697	773	486	437	470	743	high	1	1	1	1	1	1	0	1	1	1571	1186	1659	2675	3329	2802	0	1183	997
38	1	1	1	1	1	1	1	1	1	666	617	715	555	1267	549	543	1005	600	high	1	1	1	1	1	1	1	1	1	1005	815	801	718	1028	2228	906	1253	767
39	1	1	1	1	1	1	1	1	1	495	495	598	512	379	542	471	391	440	high	1	1	1	0	1	1	1	1	1	1707	837	1780	4763	1199	1464	1573	1045	893
40	1	1	1	1	1	1	1	1	1	552	492	479	446	557	415	440	424	399	high	1	1	1	1	1	1	1	1	1	2243	3409	4821	730	817	1759	718	1663	1757
	Manipulation Dual Task
Sandwich Masking Task	ACC1	ACC2	ACC3	ACC4	ACC5	ACC6	ACC7	ACC8	ACC9	RT1	RT2	RT3	RT4	RT5	RT6	RT7	RT8	RT9	Working-memory Task	ACC_1	ACC_2	ACC_3	ACC_4	ACC_5	ACC_6	ACC_7	ACC_8	ACC_9	RT_1	RT_2	RT_3	RT_4	RT_5	RT_6	RT_7	RT_8	RT_9
1	1	1	1	1	1	1	1	1	1	400	328	431	328	382	379	387	393	439	low	1	1	1	1	1	1	1	1	1	850	407	1411	1591	763	958	1805	582	435
2	1	1	1	1	1	1	1	1	1	470	482	358	449	422	403	355	572	441	low	1	1	1	1	1	1	1	1	1	581	1048	760	1479	558	505	705	801	1272
3	1	1	1	1	1	1	1	1	1	439	368	422	463	484	476	473	360	1233	low	1	1	1	1	1	1	1	1	1	814	838	619	479	503	466	1164	898	1082
4	1	1	1	1	1	1	1	1	1	299	468	470	434	337	436	375	435	348	low	0	1	1	1	1	1	1	1	1	1062	769	819	578	1091	623	644	1089	405
5	1	1	1	1	1	1	1	1	1	380	397	476	517	550	455	882	389	334	low	1	1	1	1	1	1	1	1	1	737	476	540	892	542	450	1317	607	1027
6	1	1	1	1	1	1	1	1	1	487	514	376	476	495	478	457	440	483	low	1	1	1	1	1	1	1	1	1	459	519	498	589	702	597	490	648	413
7	1	1	1	1	1	1	1	1	1	430	318	404	404	411	402	459	401	694	low	1	1	1	1	1	1	1	1	1	1047	327	584	539	671	999	928	707	2185
8	1	1	1	1	1	1	1	1	1	421	335	403	447	324	426	366	448	352	low	1	1	1	1	1	1	0	1	1	797	453	2080	640	368	757	390	641	1032
9	1	1	1	1	1	1	1	1	1	393	400	373	401	366	417	355	394	400	low	1	1	1	0	1	1	1	1	1	1936	1247	648	859	583	444	630	793	420
10	1	1	1	1	1	1	1	1	1	415	358	352	457	398	343	323	629	275	low	1	1	0	1	1	0	1	1	1	924	554	440	524	387	597	601	639	419
11	1	1	1	1	1	1	1	1	1	493	456	376	439	452	393	433	366	378	low	1	1	1	1	1	1	1	1	1	644	777	950	604	783	426	1032	646	431
12	1	1	1	1	1	1	1	1	1	355	451	347	394	363	388	294	355	316	low	1	1	1	1	1	1	1	1	1	720	697	418	472	807	492	577	589	1076
13	1	1	1	1	1	1	1	1	1	416	365	392	371	380	447	459	386	369	low	1	1	0	1	0	1	1	1	1	438	411	996	535	751	595	677	591	409
14	1	1	1	1	1	1	1	1	1	355	530	323	428	426	353	368	818	354	low	1	1	1	1	1	1	1	0	1	1262	541	611	394	669	658	482	1652	584
15	1	1	1	1	1	1	1	1	1	468	530	374	365	374	508	383	374	369	low	1	1	1	1	1	1	1	1	1	553	822	1358	559	974	538	625	537	500
16	1	1	1	1	1	1	1	1	1	435	425	385	407	363	460	334	318	344	low	1	1	1	1	1	1	1	1	1	657	601	704	475	572	927	631	893	548
17	1	1	1	1	1	1	1	1	1	436	385	435	379	337	353	308	454	428	low	1	1	0	1	1	1	0	1	1	600	580	697	563	684	507	875	665	706
18	1	1	1	1	1	1	1	1	1	331	425	374	329	362	406	447	388	445	low	1	1	1	1	0	1	1	1	1	630	483	529	746	661	530	499	1352	1349
19	1	1	1	1	1	1	1	0	1	446	721	600	420	426	405	452	333	335	low	1	1	1	1	0	1	1	1	1	1193	626	1699	706	1327	1020	513	427	507
20	1	1	1	1	1	1	1	1	1	373	493	450	488	495	318	392	366	411	low	1	1	1	1	1	0	1	1	1	624	487	761	692	626	501	378	1618	450
21	1	1	1	1	1	1	1	1	1	472	367	395	492	527	464	371	416	321	high	1	1	1	1	1	1	1	1	1	516	439	517	726	341	581	437	741	515
22	1	1	1	1	1	1	1	1	1	426	941	361	506	491	430	474	554	513	high	1	0	0	1	1	1	1	1	1	331	724	517	893	434	1398	643	782	1588
23	1	1	1	1	1	1	1	1	1	391	400	489	409	493	425	380	456	420	high	1	1	0	1	1	1	1	1	1	1478	679	634	542	1850	999	455	843	354
24	1	1	1	1	1	1	1	1	1	509	500	458	461	403	466	409	299	474	high	1	0	0	1	0	1	0	0	1	916	493	711	851	896	1323	1094	1113	1084
25	1	1	1	1	1	1	1	1	1	410	435	312	613	357	746	420	434	548	high	1	1	1	1	1	1	1	1	1	1105	1873	958	1674	1428	1470	1385	598	1797
26	1	1	1	1	1	1	1	1	1	472	419	388	376	417	501	407	419	368	high	1	1	0	1	0	0	0	1	0	1107	1402	1423	801	1651	1443	1271	1386	1223
27	1	1	1	1	1	1	1	1	1	458	449	599	394	432	521	424	571	537	high	0	0	0	0	0	0	0	0	1	4465	990	2081	647	2176	1538	3392	817	918
28	1	1	1	1	1	1	1	1	1	1231	1301	395	389	467	377	393	497	453	high	1	0	0	1	1	0	1	0	0	1680	968	842	756	1313	860	898	704	1001
29	1	1	1	1	1	1	1	1	1	404	374	615	531	324	360	407	362	412	high	1	0	1	1	0	0	0	0	1	698	1189	1165	1006	480	2834	2145	638	945
30	1	1	1	1	1	1	1	1	1	522	304	412	371	584	369	405	433	351	high	0	1	0	1	1	1	1	0	1	2467	1732	576	1140	2788	863	1714	803	1100
31	1	1	1	1	1	1	1	1	1	483	381	388	377	526	441	628	576	503	high	1	1	1	0	1	1	1	1	0	1643	1009	553	2074	914	798	1421	897	1094
32	1	1	1	1	1	1	1	1	1	372	380	773	478	337	427	443	406	377	high	0	1	1	0	0	1	0	1	0	721	688	2377	1074	452	1388	567	1897	967
33	1	1	1	1	1	1	1	1	1	386	414	498	344	345	518	426	426	350	high	0	0	1	1	0	0	1	1	0	1198	1044	1440	1590	687	722	1200	927	1112
34	1	1	1	1	1	1	1	1	1	358	430	334	464	392	333	444	375	443	high	0	1	0	1	0	1	0	1	1	993	671	495	928	1036	964	981	1602	903
35	1	1	1	1	1	1	1	1	1	414	404	556	386	360	514	385	417	376	high	1	0	1	0	0	1	0	0	1	2232	1367	879	572	1491	508	1154	531	1042
36	1	1	1	1	1	1	1	1	1	372	381	444	458	532	362	436	367	562	high	1	0	0	0	1	1	1	0	1	960	818	1987	1532	2767	568	1253	1794	824
37	1	1	1	1	1	1	1	1	1	396	344	375	353	497	532	488	422	344	high	1	0	1	0	1	0	0	1	1	851	1317	994	633	2220	1146	654	692	1484
38	1	1	1	1	1	1	1	1	1	366	370	496	472	407	406	276	484	441	high	0	1	1	0	1	1	1	1	1	707	557	481	752	1205	1290	372	542	974
39	1	1	1	1	1	1	1	1	1	437	501	481	441	325	651	468	400	393	high	0	1	0	1	0	0	0	0	0	1219	511	1376	1298	1060	1333	978	787	1910
40	1	1	1	1	1	1	1	1	1	409	421	459	391	386	482	380	353	478	high	1	1	1	0	0	1	1	1	1	1306	698	649	1082	1890	444	679	684	913

## Sheet: 8
	Maintenance Dual Task
Sandwich Masking Task	ACC1	ACC2	ACC3	ACC4	ACC5	ACC6	ACC7	ACC8	ACC9	RT1	RT2	RT3	RT4	RT5	RT6	RT7	RT8	RT9	Working-memory Task	ACC_1	ACC_2	ACC_3	ACC_4	ACC_5	ACC_6	ACC_7	ACC_8	ACC_9	RT_1	RT_2	RT_3	RT_4	RT_5	RT_6	RT_7	RT_8	RT_9
1	1	1	1	1	1	0	1	1	1	515	719	437	1218	635	386	606	674	889	low	1	1	1	1	1	1	1	1	1	325	2800	736	745	655	357	721	1262	493
2	1	1	1	1	1	1	1	1	1	534	528	393	666	665	703	517	510	507	low	1	1	1	1	1	1	1	1	1	347	471	641	797	790	452	709	543	554
3	1	1	1	1	1	1	1	1	1	521	583	354	488	614	880	946	602	584	low	1	1	1	1	1	1	1	1	1	373	417	793	720	753	532	526	1517	665
4	1	1	1	1	1	1	1	1	1	396	796	332	717	534	489	461	467	466	low	1	1	1	1	1	1	1	0	1	420	532	405	682	631	523	696	583	573
5	1	1	1	1	1	1	1	1	1	677	1545	374	487	600	642	508	482	433	low	0	1	1	1	1	1	1	1	1	1005	687	401	482	569	418	733	610	1982
6	1	1	1	1	1	1	1	0	1	608	680	479	715	601	534	425	384	649	low	1	0	1	1	1	1	1	1	1	1519	533	832	860	657	714	853	648	554
7	1	1	1	1	1	1	1	1	1	432	665	435	694	617	734	498	539	848	low	1	1	1	1	1	1	1	1	1	603	363	1716	447	524	461	504	745	614
8	1	1	1	1	1	1	1	1	1	423	476	378	578	568	589	471	527	535	low	1	1	1	1	1	1	0	1	1	487	485	667	964	607	480	0	576	461
9	1	0	1	1	1	1	1	1	1	446	869	371	547	655	882	454	620	651	low	1	1	1	1	1	1	1	1	1	405	460	616	646	857	591	562	924	1729
10	1	1	1	1	1	1	1	1	1	468	591	364	695	636	604	534	556	666	low	1	1	0	1	1	1	1	1	1	866	322	440	516	619	900	282	646	422
11	1	1	1	1	1	1	1	1	1	489	740	470	578	539	705	378	615	464	low	1	1	1	1	1	1	1	1	1	723	480	534	1189	835	678	306	914	635
12	1	1	1	1	1	1	1	1	1	542	595	619	707	479	549	581	639	639	low	1	1	1	1	1	1	1	1	1	598	937	451	821	1142	1096	545	919	493
13	1	1	0	1	1	1	1	1	1	727	728	0	686	553	716	923	588	773	low	1	1	1	0	1	1	1	1	1	700	382	426	592	828	442	479	621	566
14	1	1	1	1	1	1	1	1	1	499	471	1482	622	671	684	533	406	576	low	1	1	1	1	1	1	1	1	1	539	487	363	620	785	593	1182	484	1281
15	1	1	1	1	1	1	1	1	1	630	706	1351	796	966	493	537	384	591	low	1	1	1	1	0	1	1	1	1	550	430	376	588	479	872	761	542	1944
16	1	1	1	1	1	1	1	1	1	693	705	537	631	572	550	484	427	383	low	0	1	1	0	1	1	1	1	1	451	410	337	913	684	4442	566	687	1101
17	1	1	1	1	1	1	1	1	1	929	785	511	804	578	557	451	428	552	low	1	1	1	1	1	1	1	1	1	503	388	462	711	444	1126	1177	923	497
18	1	1	1	1	1	1	1	1	1	501	527	527	587	471	499	402	437	489	low	1	1	1	1	1	1	0	1	1	929	363	548	377	378	998	758	782	530
19	1	1	1	1	1	1	1	1	1	583	870	738	587	737	588	628	429	477	low	1	1	1	1	1	1	1	1	1	705	390	491	420	517	953	492	875	1464
20	1	1	1	1	1	1	1	1	1	938	768	572	524	576	433	635	381	418	low	1	1	1	1	1	0	1	1	1	785	749	534	443	538	1577	621	1490	643
21	1	1	1	1	1	1	1	1	1	602	635	573	606	454	524	466	472	442	high	1	1	1	1	1	1	1	1	1	2116	1507	1863	1581	1109	756	670	960	764
22	1	1	0	1	1	1	1	1	1	908	719	510	702	465	677	465	407	464	high	1	1	1	1	1	1	0	1	1	1862	2802	930	2514	1379	776	885	754	417
23	1	1	1	1	1	1	1	1	1	846	621	578	619	635	709	448	456	1093	high	1	1	1	1	1	1	1	0	1	2105	2554	1463	1407	2290	747	628	484	539
24	1	1	1	1	1	1	1	1	1	676	529	670	570	526	629	471	615	531	high	1	1	1	1	1	1	1	1	0	653	2402	2280	1010	1584	864	381	388	1032
25	1	1	1	1	1	1	1	1	1	433	552	544	555	502	634	632	634	515	high	1	1	1	1	1	1	1	1	1	893	2480	1787	2104	593	693	483	680	3216
26	1	1	1	1	1	1	1	1	1	472	575	663	669	543	652	452	417	480	high	0	1	1	1	1	1	1	1	1	1477	912	1352	1603	1375	1194	541	706	3706
27	1	1	1	1	1	1	1	1	1	733	821	553	711	582	608	586	442	606	high	0	1	1	1	1	1	1	1	1	2041	3126	802	2208	1357	1780	635	718	1663
28	1	1	1	1	1	1	1	1	0	681	641	533	467	603	387	523	442	430	high	1	1	1	1	1	1	1	1	1	511	1561	1217	1630	2410	4810	507	1340	2875
29	1	1	1	1	1	1	1	1	1	565	884	409	584	608	561	526	379	391	high	1	0	1	1	1	0	1	1	1	680	560	963	3283	1030	525	461	1117	2346
30	1	1	1	1	1	0	1	1	1	582	461	427	489	755	964	545	397	481	high	1	1	1	1	1	1	1	1	1	1664	1180	2474	1351	1288	1247	496	650	1914
31	1	1	1	1	1	1	1	1	1	647	839	348	589	881	682	515	463	559	high	1	1	1	1	1	1	1	0	1	4879	704	1274	1370	836	945	709	3934	2763
32	1	1	1	1	1	1	1	1	1	549	514	424	446	774	1004	455	486	594	high	1	1	1	0	1	1	1	1	1	609	1511	1450	1623	1650	803	510	2191	3549
33	1	1	1	1	1	1	1	1	1	551	525	350	516	1055	690	524	644	572	high	0	1	1	1	1	1	1	1	1	3307	976	988	957	1820	574	768	3844	2989
34	1	1	1	1	1	1	1	1	1	938	402	434	503	508	881	511	690	459	high	0	1	1	1	1	1	1	1	1	0	1629	1772	1246	847	372	635	1548	3120
35	1	1	1	1	1	1	1	1	1	540	559	427	523	705	555	659	623	912	high	0	0	1	1	1	1	1	1	1	2247	1857	1700	1448	2021	486	773	2740	1224
36	1	1	1	1	1	1	1	1	1	525	661	412	462	491	721	575	605	996	high	1	1	1	1	1	1	1	0	1	1245	1300	1711	1046	1477	501	935	4292	962
37	1	1	1	1	1	1	1	1	1	601	648	413	451	1135	1025	971	701	468	high	1	1	1	1	0	1	1	1	1	2155	747	1793	1504	1564	382	544	2174	1681
38	0	1	1	1	1	1	1	1	1	0	634	446	475	618	709	424	891	395	high	1	1	1	1	1	1	1	1	1	1001	2755	630	1018	942	545	525	1857	2879
39	1	1	1	1	1	1	1	1	1	2979	495	430	777	922	597	662	733	413	high	1	1	1	1	1	1	1	1	1	2132	3083	1222	1522	3019	491	986	1744	850
40	1	1	1	1	1	1	1	1	1	1352	536	694	1426	638	1210	760	520	470	high	1	1	1	0	0	1	0	1	1	2132	2271	799	0	681	893	1182	806	2168
	Manipulation Dual Task
Sandwich Masking Task	ACC1	ACC2	ACC3	ACC4	ACC5	ACC6	ACC7	ACC8	ACC9	RT1	RT2	RT3	RT4	RT5	RT6	RT7	RT8	RT9	Working-memory Task	ACC_1	ACC_2	ACC_3	ACC_4	ACC_5	ACC_6	ACC_7	ACC_8	ACC_9	RT_1	RT_2	RT_3	RT_4	RT_5	RT_6	RT_7	RT_8	RT_9
1	1	1	1	1	1	1	1	1	1	352	466	335	372	366	415	369	348	380	low	1	1	1	1	1	1	1	1	1	354	384	366	465	667	595	754	4104	526
2	1	1	1	1	1	1	1	1	1	327	543	345	504	403	427	358	448	447	low	1	1	1	1	1	1	1	1	1	386	351	406	389	355	412	470	339	485
3	1	1	1	1	1	1	1	1	1	340	411	882	437	375	408	455	299	349	low	1	1	1	1	1	1	1	1	1	332	389	373	407	383	434	462	541	399
4	1	1	1	1	1	1	1	1	1	361	354	351	391	376	553	365	376	317	low	1	1	1	1	1	1	1	1	1	423	434	361	360	369	310	383	333	474
5	1	1	1	1	1	1	1	1	1	552	335	364	401	449	369	481	350	380	low	1	0	1	1	0	1	1	1	1	2828	689	641	2032	1402	1923	435	395	511
6	1	1	1	1	1	1	1	1	0	322	396	399	415	368	476	451	413	309	low	1	1	1	1	1	1	0	1	1	942	850	1412	1215	1244	1305	417	468	670
7	1	1	1	1	1	1	1	1	1	330	500	268	351	329	348	373	494	405	low	1	1	1	1	1	0	1	1	1	411	453	438	722	536	483	527	1192	491
8	1	1	1	1	1	1	1	1	1	394	399	367	406	345	466	367	465	362	low	1	1	1	1	1	1	1	1	1	441	366	615	407	874	518	531	378	752
9	1	1	1	1	1	1	1	1	1	358	367	355	304	363	367	335	322	431	low	1	1	1	1	1	1	1	1	1	413	646	398	389	321	425	400	424	558
10	1	1	1	1	1	1	1	1	1	365	341	359	354	316	312	348	370	362	low	1	1	1	1	1	1	1	1	1	418	343	523	477	606	598	698	518	481
11	1	1	1	1	1	1	1	1	1	415	299	371	334	301	261	380	400	298	low	1	1	1	1	1	1	1	1	1	565	566	474	487	501	482	538	629	540
12	1	1	1	1	1	1	1	1	1	379	331	320	341	352	368	403	403	418	low	1	1	1	1	1	1	1	1	1	405	666	394	396	406	550	500	455	409
13	1	1	1	1	1	1	1	1	1	363	395	326	340	364	270	325	437	381	low	1	0	1	1	0	1	0	0	1	4148	930	518	983	4434	2032	2172	1524	997
14	1	1	1	1	1	0	1	1	1	368	330	439	311	301	159	292	338	327	low	1	1	1	1	1	1	0	0	1	1300	1834	685	739	796	2018	1831	3398	13
15	1	1	1	1	1	1	1	1	1	394	374	421	343	300	354	614	313	352	low	0	0	1	1	1	1	1	1	1	1273	835	1440	575	757	815	892	1013	1383
16	1	1	1	0	1	1	1	1	1	400	594	298	234	384	339	396	440	355	low	1	1	0	1	1	0	1	1	1	2026	577	853	1150	772	704	425	625	660
17	1	1	1	1	1	1	1	1	1	364	374	296	360	332	364	387	313	315	low	1	1	0	1	1	0	1	1	1	613	2437	563	1305	2114	869	447	399	766
18	1	1	1	1	1	1	1	1	1	538	348	354	323	450	317	423	346	364	low	1	1	1	1	1	1	1	1	1	1468	948	1390	932	3263	783	1142	765	797
19	1	1	1	1	1	1	1	1	1	449	470	403	350	456	373	400	609	468	low	1	1	1	1	1	1	1	1	1	862	1108	1207	1352	1720	1477	2219	1246	873
20	1	1	1	1	1	1	1	1	1	373	484	365	398	498	415	531	485	430	low	1	1	1	0	0	0	1	0	1	1512	750	2696	1379	2040	1878	773	1608	1870
21	1	1	1	1	1	1	1	1	1	372	396	383	465	351	396	424	333	333	high	1	1	0	1	1	1	0	1	1	1390	549	721	560	1620	563	1540	1639	1043
22	1	1	1	1	1	1	1	1	1	473	410	556	295	388	295	397	428	434	high	1	1	1	0	0	0	1	1	0	1125	3673	199	0	3112	457	2356	1874	744
23	1	1	1	1	1	1	1	1	1	387	326	350	412	350	348	440	442	356	high	1	1	1	1	0	0	1	1	1	1613	999	959	1092	931	912	1376	1688	858
24	1	1	1	1	1	1	1	1	1	344	396	304	345	354	362	415	351	596	high	1	1	1	0	1	1	1	1	1	3012	536	2991	531	479	1108	513	935	958
25	1	1	1	1	1	1	1	1	1	503	642	420	340	332	475	480	413	334	high	0	1	0	0	1	1	1	1	0	2317	1802	1412	1090	920	583	1074	703	649
26	1	1	1	1	1	1	1	1	1	349	301	369	333	346	617	372	540	322	high	1	1	1	1	0	0	0	0	1	1316	596	3279	941	1942	464	474	1162	911
27	1	1	1	1	0	1	1	1	1	276	337	348	359	233	372	549	580	323	high	1	1	1	1	0	0	0	1	1	692	688	1034	602	2139	378	686	632	1428
28	1	1	1	1	1	1	1	1	0	367	540	338	481	370	452	488	397	329	high	1	0	0	0	1	1	1	0	0	1452	747	553	1120	1076	931	569	576	1510
29	1	1	1	1	1	1	1	1	1	415	456	388	377	475	421	370	460	380	high	0	1	1	1	0	1	1	1	0	1068	679	407	1191	507	988	429	571	963
30	1	1	1	1	1	1	1	0	1	416	482	359	424	477	460	467	289	390	high	0	0	1	1	1	0	0	0	1	465	601	719	1393	736	1419	486	1049	844
31	1	1	1	1	1	1	1	1	1	435	349	862	530	474	391	460	458	374	high	1	1	1	0	1	1	1	1	0	785	1138	1273	720	1939	857	1055	927	501
32	1	1	1	1	1	1	1	1	1	354	435	369	352	330	470	477	691	387	high	1	1	1	1	1	1	1	1	1	695	1763	2210	762	529	603	572	790	450
33	1	1	1	1	1	1	1	1	1	2340	386	374	1289	330	450	578	346	453	high	0	1	1	0	0	0	1	1	0	938	1363	2367	0	554	4022	339	444	462
34	1	1	1	1	1	1	1	1	1	482	399	464	377	518	325	451	346	440	high	1	0	0	1	0	1	1	0	1	1141	721	1487	817	835	854	1317	714	1203
35	1	1	1	1	1	1	1	1	1	354	2494	382	712	532	698	898	314	385	high	1	0	1	1	1	1	1	0	1	1144	801	1437	554	485	571	1432	641	702
36	1	1	1	1	1	1	1	1	1	475	362	344	481	357	461	504	346	529	high	1	1	0	0	0	0	1	1	1	531	1605	806	572	596	411	362	317	764
37	1	1	1	1	1	1	1	1	1	350	352	676	409	358	401	356	433	438	high	1	1	1	1	1	1	1	1	1	477	781	1182	1208	1536	557	472	299	535
38	1	1	1	1	1	1	1	1	1	503	467	459	515	473	396	515	890	759	high	1	1	1	0	1	0	0	1	1	517	907	519	323	1104	792	466	752	1068
39	1	1	1	1	1	1	1	1	1	713	389	525	376	471	420	539	404	447	high	1	1	1	0	1	1	0	0	0	564	649	887	1027	581	690	981	599	518
40	1	1	1	1	1	1	1	1	1	402	554	413	458	547	454	383	331	437	high	0	0	0	1	1	0	1	0	0	694	524	2713	862	1293	1042	729	427	464

## Sheet: 9
	Maintenance Dual Task
Sandwich Masking Task	ACC1	ACC2	ACC3	ACC4	ACC5	ACC6	ACC7	ACC8	ACC9	RT1	RT2	RT3	RT4	RT5	RT6	RT7	RT8	RT9	Working-memory Task	ACC_1	ACC_2	ACC_3	ACC_4	ACC_5	ACC_6	ACC_7	ACC_8	ACC_9	RT_1	RT_2	RT_3	RT_4	RT_5	RT_6	RT_7	RT_8	RT_9
1	1	1	1	1	1	1	1	1	1	570	680	450	544	550	434	359	751	590	low	1	1	1	1	1	1	1	1	1	782	614	665	553	1058	1891	709	670	610
2	1	1	1	1	1	1	1	1	1	694	634	410	504	604	623	572	736	744	low	1	1	1	1	1	1	1	1	1	667	648	1427	492	2348	1133	793	451	719
3	1	1	1	1	1	1	1	1	1	920	862	1269	667	585	461	566	437	1735	low	1	1	1	1	1	1	1	1	1	542	2287	1671	494	2374	1379	842	662	625
4	1	1	1	1	1	1	1	1	1	1024	444	989	551	744	1032	853	698	1803	low	1	1	1	1	1	1	1	1	1	663	672	1123	810	1819	2630	1020	613	517
5	1	1	1	1	1	1	1	1	1	537	1439	1093	553	921	1336	888	971	2204	low	1	1	1	1	1	1	1	1	1	649	3425	2040	829	2331	1396	699	613	632
6	1	1	1	1	1	1	1	1	1	913	697	808	578	767	1094	719	692	839	low	1	1	1	1	1	1	1	1	1	820	976	2137	553	1048	2547	567	466	781
7	1	1	1	1	1	1	1	1	1	786	731	770	400	708	1206	400	845	961	low	1	1	1	1	1	1	1	1	1	805	714	1622	700	3200	1010	596	569	511
8	1	1	1	1	1	1	1	1	1	524	629	685	370	768	588	774	747	1720	low	1	1	1	1	1	1	1	1	1	504	957	1261	560	1005	638	920	459	407
9	1	1	1	1	1	1	1	1	1	697	588	741	382	859	688	627	448	600	low	1	1	1	1	1	1	1	1	1	606	771	1122	556	3211	721	1236	1072	555
10	1	1	1	1	1	1	1	1	1	876	989	937	547	566	1840	546	928	1665	low	1	1	1	1	1	1	1	1	1	616	980	682	880	973	959	694	595	989
11	1	1	1	1	1	1	1	1	1	917	590	460	796	659	947	670	641	701	low	1	1	1	1	1	1	1	1	1	683	746	945	1190	593	1200	623	839	447
12	1	1	1	1	1	1	1	1	1	543	767	806	380	906	1969	646	1137	1013	low	1	1	1	1	1	1	1	1	1	544	721	830	1564	1147	1538	703	2166	517
13	1	1	1	1	1	1	1	1	1	1077	672	563	538	509	440	685	730	755	low	1	1	1	1	1	1	1	1	1	1524	790	776	883	946	2635	457	836	901
14	1	1	1	1	1	1	1	1	1	691	499	531	611	569	535	452	549	547	low	1	1	1	1	1	1	1	1	1	615	950	691	787	772	722	844	2455	578
15	1	1	1	1	1	1	1	1	1	2406	778	2873	524	557	627	825	1352	969	low	1	1	1	1	1	1	1	1	1	689	742	805	605	885	647	864	1059	725
16	1	1	1	1	1	1	1	1	1	781	656	875	555	538	421	619	598	1171	low	1	1	1	1	1	1	1	1	1	799	1143	1111	597	718	614	1112	1215	508
17	1	1	1	1	1	1	1	1	1	641	984	715	638	583	619	503	605	545	low	1	1	1	1	1	1	1	1	1	724	660	1460	946	813	709	1560	3125	774
18	1	1	1	1	1	1	1	1	1	1312	647	669	561	627	584	458	618	4394	low	1	1	1	1	1	1	1	1	1	968	1247	1211	924	2320	1368	958	1859	868
19	1	1	1	1	1	1	1	1	1	666	479	496	528	378	638	800	1709	640	low	1	1	1	1	1	1	1	1	1	1846	930	777	800	884	1134	879	656	628
20	1	1	1	1	1	1	1	1	1	569	624	1958	688	379	370	1029	1340	623	low	1	1	1	1	1	1	1	1	1	3970	600	718	544	767	1392	589	622	449
21	1	1	1	1	1	1	1	1	1	716	948	975	1275	2094	1105	2714	874	1381	high	1	1	1	1	1	1	1	1	1	1208	1186	1480	808	1845	1650	2507	1706	1229
22	1	1	1	1	1	1	1	1	1	1745	603	861	375	829	871	1286	771	1782	high	1	1	1	1	1	1	1	1	1	1540	1549	1767	2907	1874	1580	1691	1222	1467
23	1	1	1	1	1	1	1	1	1	600	687	776	848	489	828	688	679	892	high	1	1	1	1	1	1	1	1	1	1014	1670	1846	1577	1490	1924	2730	2342	851
24	1	1	1	1	1	1	1	1	1	1628	720	515	653	533	901	2953	721	893	high	1	1	1	1	1	1	1	1	1	1872	1120	979	2444	1184	1178	3480	1588	1058
25	1	1	1	1	1	1	1	1	1	907	732	626	584	1054	619	1376	708	1666	high	1	1	1	1	1	1	1	1	1	2133	1775	1668	1374	1508	2209	2808	1761	1345
26	1	1	1	1	1	1	1	1	1	646	553	608	495	647	657	428	861	1045	high	1	1	1	1	0	1	1	1	0	961	1603	2017	1997	2320	808	935	1452	0
27	1	1	1	1	1	1	1	1	1	654	843	1380	780	508	503	770	765	2492	high	1	1	1	1	1	0	1	1	1	903	833	903	2981	1349	2277	1801	1721	918
28	1	1	1	1	1	1	1	1	1	1332	934	605	723	1117	712	555	707	716	high	1	1	1	1	1	1	0	1	1	2537	818	1923	1639	1686	1743	2312	2247	2546
29	1	1	1	1	1	1	1	1	1	793	513	608	557	544	630	785	821	1547	high	1	1	1	1	1	1	1	1	1	1989	2529	1729	1161	1412	2185	1345	977	1303
30	1	1	1	1	1	1	1	1	1	789	619	558	439	616	465	647	751	940	high	1	1	1	1	1	1	1	1	1	1390	1159	1226	886	2754	1304	1195	894	1234
31	1	1	1	1	1	1	1	1	1	588	559	642	515	460	440	525	543	1697	high	1	1	1	1	1	1	1	1	1	994	1950	1176	2182	1293	1076	1726	1536	1271
32	1	1	1	1	1	1	1	1	1	466	405	684	842	689	481	427	536	636	high	1	1	1	1	1	1	1	1	0	3640	2939	1351	645	1199	1567	3512	1365	2610
33	1	1	1	1	1	1	1	1	1	976	356	717	475	383	868	433	596	613	high	1	1	1	1	1	1	1	1	1	2074	1520	986	1987	2371	3381	959	1107	3133
34	1	1	1	1	1	1	0	1	1	1206	515	700	572	470	1046	727	985	1890	high	1	1	1	1	1	1	1	1	1	697	973	1035	1280	1090	1055	2368	938	3863
35	1	1	1	1	1	1	1	1	1	1548	4091	2249	595	530	432	450	466	2977	high	1	1	1	1	1	1	1	1	1	1052	850	746	1316	1875	1661	1356	881	3521
36	1	1	1	1	1	1	1	1	1	1021	768	1185	1095	727	432	965	748	1473	high	1	1	1	1	1	1	1	1	1	2875	1021	1529	2010	1676	1747	1269	902	1257
37	1	1	1	1	1	1	1	1	1	436	497	1919	757	1170	632	417	765	627	high	1	1	1	1	1	1	1	1	1	1644	1711	1228	1372	1475	3437	873	3647	3448
38	1	1	1	1	1	1	1	0	1	561	547	580	1012	733	897	1081	474	722	high	1	1	1	1	1	1	1	1	1	862	1018	1423	1019	2953	1816	1392	1145	1109
39	1	1	1	1	1	1	1	1	1	1221	623	404	1126	1501	1545	1157	717	862	high	0	1	1	1	1	1	1	1	1	0	786	1526	1743	1535	1644	2359	1331	1618
40	1	1	1	1	1	1	1	1	1	681	1940	833	466	749	1073	526	2048	886	high	1	1	1	1	1	1	1	1	1	1340	598	1105	1171	2471	2805	1878	2679	1965
	Manipulation Dual Task
Sandwich Masking Task	ACC1	ACC2	ACC3	ACC4	ACC5	ACC6	ACC7	ACC8	ACC9	RT1	RT2	RT3	RT4	RT5	RT6	RT7	RT8	RT9	Working-memory Task	ACC_1	ACC_2	ACC_3	ACC_4	ACC_5	ACC_6	ACC_7	ACC_8	ACC_9	RT_1	RT_2	RT_3	RT_4	RT_5	RT_6	RT_7	RT_8	RT_9
1	1	1	1	1	1	1	1	1	1	482	445	455	738	344	408	364	619	438	low	1	1	1	1	1	1	1	1	1	562	419	850	569	534	852	856	387	573
2	1	1	1	1	1	1	1	1	1	452	482	385	405	465	451	545	546	529	low	1	1	1	1	1	1	1	1	1	597	608	1763	748	735	1121	1178	594	585
3	1	1	1	1	1	1	1	1	1	479	507	684	580	475	451	628	505	477	low	1	1	1	1	1	1	1	1	1	1493	910	1315	1583	1015	704	1123	760	430
4	1	1	1	1	1	1	1	1	1	1223	568	469	407	511	447	462	560	467	low	1	1	1	1	1	1	1	1	1	1359	648	797	633	500	458	1760	1687	479
5	1	1	1	1	1	1	1	1	1	389	575	379	453	398	581	436	490	406	low	1	1	1	1	1	1	1	1	1	2110	538	745	748	707	665	1901	2140	699
6	1	1	1	1	1	1	1	1	1	342	468	374	341	536	511	371	351	410	low	1	1	1	1	1	1	1	1	1	824	510	766	832	793	2163	2367	1552	953
7	1	1	1	1	1	1	1	1	1	698	1544	391	379	656	626	436	420	627	low	1	1	1	1	1	1	1	1	1	861	765	690	795	559	553	1098	1432	486
8	1	1	1	1	1	1	1	1	1	508	500	352	385	1142	407	375	379	461	low	1	1	1	1	1	1	1	1	1	446	568	776	492	773	767	675	1105	547
9	1	1	1	1	1	1	1	1	1	632	401	455	378	359	551	456	320	799	low	1	1	1	1	1	1	1	1	1	551	683	466	1647	775	524	1554	1420	466
10	1	1	1	1	1	1	1	1	1	507	431	388	362	301	354	644	677	364	low	1	1	1	1	1	1	1	1	1	563	779	546	535	514	552	1032	939	413
11	1	1	1	1	1	1	1	1	1	449	356	980	534	331	512	381	412	457	low	1	1	1	1	1	1	1	1	1	869	1162	630	532	578	876	514	949	510
12	1	1	1	1	1	1	1	1	1	351	410	519	777	524	591	642	399	377	low	1	1	1	1	1	1	1	1	1	432	809	584	1045	614	591	846	608	502
13	1	1	1	1	1	1	1	1	1	473	360	663	321	378	365	350	545	386	low	1	1	1	1	1	1	1	1	1	2089	1626	666	617	461	438	640	1137	711
14	1	1	1	1	1	1	1	1	1	331	414	274	403	383	1130	685	381	351	low	1	1	1	1	1	1	1	1	1	595	1030	1121	1038	633	1831	564	1023	591
15	1	1	1	1	1	1	1	1	1	419	526	455	476	576	428	468	354	450	low	1	1	1	1	1	1	1	1	1	704	755	784	814	1001	1015	571	646	452
16	1	1	1	1	1	1	1	1	1	509	492	418	372	355	354	384	393	357	low	1	1	1	1	1	0	1	1	1	639	936	612	588	1130	703	2089	1062	532
17	1	1	1	1	1	1	1	1	1	1948	448	1791	2594	1704	1901	618	448	436	low	1	1	1	1	1	1	1	1	1	2092	1458	1762	2183	1219	2287	1212	993	673
18	1	1	1	1	1	0	1	1	1	827	2083	728	1652	1231	2056	591	1594	540	low	1	1	1	1	1	1	1	1	1	2777	3026	1404	1858	1519	1102	1269	1772	981
19	1	1	1	1	1	1	1	1	1	944	702	2460	1650	2562	649	2896	714	1028	low	1	1	1	1	1	1	1	1	1	2071	1114	1683	1180	2349	1563	1954	1096	1165
20	1	1	1	1	1	1	1	1	1	2024	1158	669	2038	2275	2213	623	600	746	low	1	1	1	1	1	1	1	1	1	885	2376	1710	2913	2126	1892	1077	1553	1245
21	1	1	1	1	1	1	1	1	1	396	675	448	1007	459	678	716	2824	587	high	1	1	1	1	1	1	1	1	1	2878	1604	1980	2640	1984	1652	1582	2874	848
22	1	1	1	1	1	0	1	1	1	1806	668	2434	723	1719	0	2923	678	596	high	1	1	1	1	1	1	1	1	1	1359	937	1732	1654	918	2046	1240	1618	780
23	1	1	1	1	1	1	1	0	1	1583	1075	751	1366	970	1813	1499	0	1316	high	1	1	1	1	1	1	1	1	1	1653	1103	1587	1000	895	898	1984	1187	1190
24	1	1	1	1	1	1	1	1	1	458	623	2628	645	562	2285	1049	1056	1855	high	1	1	1	1	1	1	1	1	1	836	1675	1081	2529	1347	716	1731	2992	1110
25	1	1	1	1	1	1	1	1	1	1563	703	1335	939	1167	568	800	1027	518	high	1	1	1	1	1	1	1	1	1	1073	2102	2514	1365	1519	1821	1111	1990	639
26	1	1	1	1	1	1	1	1	1	974	1363	1359	648	1407	810	1378	588	479	high	1	1	1	1	1	1	1	1	1	1217	1981	692	610	3174	1998	1722	1290	1327
27	1	1	1	1	1	1	1	1	1	1167	625	566	1488	936	848	441	799	530	high	1	1	1	1	1	1	1	1	1	2062	1085	1408	928	2707	2206	3452	2530	1842
28	1	1	1	1	1	1	1	1	1	1062	918	2446	1447	1842	514	519	487	405	high	1	1	1	1	1	1	1	1	1	3014	1574	2857	1211	3963	1128	1586	1811	1533
29	1	1	1	1	1	1	0	1	1	537	674	498	1244	1243	2048	0	2021	552	high	1	1	1	1	1	1	1	1	1	1061	2013	2903	1749	2376	960	1638	2352	643
30	1	1	1	1	1	1	1	1	1	620	515	1098	578	559	582	524	714	590	high	1	1	1	1	1	1	1	1	1	949	2323	921	2783	2740	2605	2067	1181	1419
31	1	1	1	1	1	1	1	1	1	2341	415	1653	1837	629	911	829	1196	552	high	1	1	1	1	1	1	1	1	1	1140	1917	2645	2194	1568	1009	1225	2152	1245
32	1	1	1	1	1	1	1	1	1	2352	522	1491	711	379	875	2050	1860	1918	high	1	1	1	1	1	1	1	1	1	4763	1410	2953	746	2301	713	1948	948	634
33	1	1	1	1	1	1	1	1	1	757	841	1042	1338	1988	868	1391	2306	2361	high	1	1	1	1	1	1	1	1	1	2958	1426	2671	2031	907	1057	3152	2005	2663
34	1	1	1	1	1	1	1	1	1	1670	799	1902	1570	1557	1201	819	1097	967	high	1	1	1	1	1	1	1	1	1	1593	3068	3101	3521	2458	2653	3223	2746	1844
35	1	1	1	1	1	1	1	1	1	2993	756	2187	1892	2750	2671	661	1087	1456	high	1	1	1	1	1	1	0	1	1	1216	2078	2898	2457	1583	2052	1342	2352	1072
36	1	1	1	1	0	1	1	1	1	1107	1060	1203	791	0	786	993	720	2399	high	1	1	1	1	1	1	1	1	1	1939	2045	1856	975	2333	1539	2637	2969	1002
37	1	1	1	1	1	1	1	1	1	749	566	881	1632	700	947	758	589	552	high	1	1	1	1	1	1	1	1	1	1434	2680	2504	986	3415	2306	2976	1901	979
38	1	1	1	1	1	1	1	1	1	595	1137	819	1139	1176	738	757	795	706	high	1	1	1	1	0	1	1	1	1	2589	2109	2672	1507	2095	2305	2343	1982	1238
39	1	1	1	1	1	1	1	1	1	966	683	2107	1026	607	1850	680	688	2185	high	1	1	1	1	1	1	1	1	1	1194	1202	915	1106	1786	1047	2495	1836	1363
40	1	1	1	1	1	1	1	1	1	568	1426	1138	719	900	599	799	712	876	high	1	1	1	1	1	1	1	1	1	995	1310	2621	1402	2391	2025	2086	2179	1215

## Sheet: 10
	Maintenance Dual Task
Sandwich Masking Task	ACC1	ACC2	ACC3	ACC4	ACC5	ACC6	ACC7	ACC8	ACC9	RT1	RT2	RT3	RT4	RT5	RT6	RT7	RT8	RT9	Working-memory Task	ACC_1	ACC_2	ACC_3	ACC_4	ACC_5	ACC_6	ACC_7	ACC_8	ACC_9	RT_1	RT_2	RT_3	RT_4	RT_5	RT_6	RT_7	RT_8	RT_9
1	1	1	1	1	1	1	1	1	1	840	2789	905	572	514	485	716	2714	1914	low	1	1	1	1	1	1	1	1	1	781	623	765	1186	380	534	547	1042	904
2	1	1	1	1	1	1	1	1	1	800	503	2711	541	1351	1288	1055	1083	634	low	1	1	1	1	1	1	1	1	1	1204	781	565	1300	555	423	411	455	1848
3	1	1	1	1	1	1	1	1	1	840	418	397	291	427	408	1165	672	1016	low	1	1	1	1	1	1	1	1	1	1203	701	737	1213	837	849	996	464	1052
4	1	1	1	1	1	1	1	1	1	672	3458	0	492	489	501	932	521	464	low	1	1	1	1	1	1	1	1	1	1020	1628	628	3641	532	583	763	491	1877
5	1	1	1	1	1	1	1	1	1	919	883	481	646	534	485	916	495	660	low	1	1	1	1	1	1	1	1	1	652	1193	708	1773	553	424	608	644	865
6	1	1	1	1	1	1	1	1	1	1824	0	586	356	761	804	413	599	736	low	1	1	1	1	1	1	1	1	1	719	997	841	761	912	651	591	1214	581
7	1	1	1	1	1	1	1	1	1	645	446	510	543	574	446	354	344	552	low	1	1	1	1	1	1	1	1	1	749	442	480	599	383	638	726	639	675
8	1	1	1	1	1	1	1	1	1	263	413	1174	600	551	1433	434	494	588	low	1	1	1	1	1	1	1	1	1	746	2362	597	546	526	1536	923	539	546
9	1	1	1	1	1	1	1	1	1	555	618	640	1400	532	367	565	663	988	low	1	1	1	1	1	1	1	1	1	1177	1103	527	630	531	401	748	443	761
10	1	1	1	1	1	1	1	1	1	308	234	291	411	228	556	291	269	289	low	1	1	1	1	1	1	1	1	1	777	800	742	969	1142	860	562	579	465
11	1	1	1	1	1	1	1	1	1	554	1023	358	368	463	298	1190	800	676	low	1	1	1	1	1	1	1	1	1	925	447	1352	964	522	740	705	642	494
12	1	1	1	1	1	1	1	1	1	755	766	844	640	578	426	306	531	412	low	1	1	1	1	1	1	1	1	1	677	536	1173	554	649	652	650	380	531
13	1	1	1	1	1	1	1	1	1	645	655	398	2329	584	704	988	1741	727	low	1	1	1	1	1	1	1	1	1	766	625	638	365	436	667	480	481	350
14	1	1	1	1	1	1	1	1	1	1304	570	609	351	630	372	404	682	1714	low	1	1	1	1	1	1	1	1	1	711	824	704	381	618	583	706	428	555
15	1	1	1	1	1	1	1	1	1	3675	540	493	678	709	556	495	2932	2537	low	1	1	1	1	1	1	1	1	1	644	561	2415	408	830	612	640	410	638
16	1	1	1	1	1	1	1	1	1	535	606	1314	849	704	550	317	1331	1053	low	1	1	1	1	1	1	1	1	1	573	792	1050	505	544	745	385	531	617
17	1	1	1	1	1	1	1	1	1	1132	808	1407	457	837	571	508	927	751	low	1	1	1	1	1	1	1	1	1	464	561	1065	587	687	672	915	1379	361
18	1	1	1	1	1	1	1	1	1	733	2043	561	440	580	899	1687	442	993	low	1	1	1	1	1	1	1	1	1	613	520	845	587	485	871	644	737	452
19	1	1	1	1	1	1	1	1	1	1231	807	556	498	537	372	904	804	1938	low	1	1	1	1	1	1	1	1	1	891	358	725	432	460	725	613	1866	542
20	1	1	1	1	1	1	1	1	1	569	409	306	1132	751	650	708	1490	832	low	1	1	1	1	1	1	1	1	1	590	529	953	673	450	553	444	3543	1892
21	1	1	1	1	1	1	1	1	1	517	820	720	301	1686	492	680	565	3455	high	1	1	1	1	1	1	1	1	1	2011	2755	1654	2478	1323	2380	2770	744	2333
22	1	1	1	1	1	1	0	1	1	906	740	668	595	739	635	1007	632	947	high	1	1	1	1	1	1	1	1	1	2103	2315	2698	1905	2547	1446	1158	888	1280
23	1	1	1	1	1	1	1	1	1	287	669	804	488	640	783	533	467	535	high	1	1	1	1	1	1	1	1	1	1798	3050	1043	2195	1523	841	1762	1387	1206
24	1	1	1	1	1	1	1	1	1	796	747	511	544	802	601	1287	573	987	high	1	1	1	1	1	1	1	1	1	2335	4776	1901	1381	2057	765	917	812	1239
25	1	1	1	1	1	1	1	1	1	596	604	827	574	351	380	362	504	405	high	1	1	1	1	1	1	1	1	1	2243	1834	1709	1049	3684	1191	1815	1444	2922
26	1	1	1	1	1	1	1	1	1	609	636	743	589	431	463	346	557	1698	high	1	1	1	1	1	1	1	1	1	2925	2458	1723	1365	1920	777	1009	1464	1410
27	1	1	1	0	1	1	1	1	1	290	533	702	1448	1149	679	690	767	565	high	1	1	1	1	1	1	1	1	1	1451	2962	2047	1047	2409	1276	1496	940	2865
28	1	1	1	1	1	1	1	1	1	716	408	658	384	574	2426	589	1545	576	high	1	1	1	1	1	1	1	1	1	1675	2782	2912	3983	3016	1064	999	1861	1570
29	1	1	1	1	1	1	1	1	1	1621	555	460	480	685	498	683	790	737	high	1	1	1	1	1	1	1	1	1	930	2079	1886	2419	1611	1852	1220	1135	2420
30	1	1	1	1	1	1	1	1	1	903	640	566	544	502	287	651	440	2459	high	1	1	1	1	1	1	1	1	1	1855	3586	1090	1422	3006	921	2036	879	2054
31	1	1	1	1	1	1	1	1	1	449	317	1010	332	1270	470	454	486	513	high	1	1	1	1	1	1	1	1	1	877	2213	2128	1475	1268	775	1944	1131	2041
32	1	1	1	1	1	1	1	1	1	1410	649	1759	312	901	646	722	315	1338	high	1	1	1	1	1	1	1	1	1	1885	3415	1409	833	1483	1867	1545	1657	1081
33	1	1	1	1	1	1	1	1	1	1187	2347	1010	972	1519	1456	850	2518	1454	high	1	1	1	1	1	1	1	1	1	1886	2083	2146	2582	1943	827	684	1424	2823
34	1	1	1	1	1	1	1	1	1	889	1779	588	542	2879	2077	0	0	1472	high	1	1	1	1	1	1	1	1	1	1517	2606	2327	1269	1523	3157	734	1120	4162
35	1	1	1	1	1	1	1	1	1	1901	925	1142	859	861	999	1188	1603	950	high	1	1	1	1	1	1	1	1	1	1182	2976	1322	1569	929	714	786	3013	1428
36	1	1	1	1	1	1	1	1	1	843	645	1388	695	2447	1532	1162	1090	1100	high	1	1	1	1	1	1	1	1	1	1889	3880	1879	1416	3239	940	1731	3871	2767
37	1	1	1	1	1	1	1	1	1	838	647	687	1332	1569	3765	0	2260	1167	high	1	1	1	1	1	1	1	1	1	1651	2385	1449	1507	1545	666	1500	2056	1762
38	1	1	1	1	1	1	1	1	1	3163	1968	1358	1410	1848	652	782	745	1308	high	1	1	1	1	1	1	1	1	1	1300	935	1345	2276	890	580	1171	3346	1972
39	1	1	1	1	1	1	1	1	1	808	2564	855	2133	902	717	1254	1458	1068	high	1	1	1	1	1	1	1	1	1	1671	1902	1874	1933	1630	1389	842	2509	3236
40	1	1	1	1	1	1	1	1	1	2028	723	636	557	912	575	512	444	1427	high	1	1	1	1	1	1	1	1	1	1659	953	1296	2817	675	635	3464	1034	2197
	Manipulation Dual Task
Sandwich Masking Task	ACC1	ACC2	ACC3	ACC4	ACC5	ACC6	ACC7	ACC8	ACC9	RT1	RT2	RT3	RT4	RT5	RT6	RT7	RT8	RT9	Working-memory Task	ACC_1	ACC_2	ACC_3	ACC_4	ACC_5	ACC_6	ACC_7	ACC_8	ACC_9	RT_1	RT_2	RT_3	RT_4	RT_5	RT_6	RT_7	RT_8	RT_9
1	1	1	1	1	1	1	1	1	1	444	716	628	802	915	773	528	854	538	low	1	1	1	1	1	1	1	1	1	1375	745	1423	659	1755	721	833	914	1171
2	1	1	1	1	1	1	1	1	1	575	612	879	766	505	548	629	424	505	low	1	1	1	1	1	1	1	1	1	1233	1113	1308	1123	1045	2043	797	707	692
3	1	1	1	1	1	1	1	1	1	591	452	623	855	788	728	672	1023	1038	low	1	1	1	1	1	1	1	1	1	1896	1316	1026	650	1073	643	1386	1393	1233
4	1	1	1	1	1	1	1	1	1	646	778	767	700	681	547	571	665	538	low	1	1	1	1	1	1	1	1	1	841	1564	1133	771	1171	1137	795	802	854
5	1	1	1	1	1	1	1	1	1	642	725	668	504	702	857	1254	601	479	low	1	1	1	1	1	1	1	1	1	854	831	706	1370	1476	3160	1719	777	683
6	1	1	1	1	1	1	1	1	1	683	538	641	1087	477	619	736	542	643	low	1	1	1	1	1	1	1	1	1	2066	686	736	651	1024	712	743	751	1497
7	1	1	1	1	1	1	1	1	1	945	593	443	537	518	682	729	612	758	low	1	1	1	1	1	1	1	1	1	936	736	730	929	924	753	618	621	874
8	1	1	1	1	1	1	1	1	1	832	543	608	632	540	609	434	579	548	low	1	1	1	1	0	1	1	1	1	926	757	692	751	823	576	562	972	848
9	1	1	1	1	1	1	1	1	1	503	965	499	578	564	552	447	547	570	low	1	1	1	1	1	1	1	1	1	1443	781	1641	1221	879	668	651	730	938
10	1	1	1	1	1	1	1	1	1	420	822	615	435	606	645	663	932	641	low	1	1	1	1	1	1	1	1	1	530	1067	641	598	489	1266	1067	621	769
11	1	1	1	1	1	1	1	1	1	701	503	386	737	535	374	549	535	588	low	1	1	1	1	1	1	1	1	1	849	825	553	761	742	1869	655	674	697
12	1	1	1	1	1	1	1	1	1	648	555	610	476	587	537	422	613	455	low	1	1	1	1	1	1	1	1	1	659	1096	488	555	738	1371	666	739	725
13	1	1	1	1	1	1	1	1	1	521	398	556	406	483	391	434	608	579	low	1	1	1	1	1	1	1	1	1	661	516	756	448	630	759	678	818	444
14	1	1	1	1	1	1	1	1	1	499	574	559	481	618	408	433	458	448	low	1	1	1	1	1	1	1	1	1	997	791	708	770	1222	350	703	620	508
15	1	1	1	1	1	1	1	1	1	713	426	487	571	429	660	660	509	561	low	1	1	1	1	1	1	1	1	1	735	753	850	612	816	1048	638	1424	627
16	1	1	1	1	1	1	1	1	1	501	647	464	612	452	540	568	586	450	low	1	1	1	1	1	1	1	1	1	714	867	1169	722	621	639	625	671	771
17	1	1	1	1	1	1	1	1	1	633	457	658	465	542	497	546	619	559	low	1	1	1	1	1	1	1	1	1	861	1045	1564	736	1083	786	520	863	566
18	1	1	1	1	1	1	1	1	1	547	451	488	596	498	632	557	419	671	low	1	1	1	1	1	1	1	1	1	855	746	826	638	660	1620	681	714	1001
19	1	1	1	1	1	1	1	1	1	463	902	612	406	502	443	660	594	787	low	1	1	1	1	1	1	1	1	1	942	1025	1069	649	832	687	888	1105	730
20	1	1	1	1	1	1	1	1	1	404	512	908	499	497	585	467	493	377	low	1	1	1	1	1	1	1	1	1	1282	509	605	645	744	511	672	1040	559
21	1	1	1	1	1	1	1	1	1	649	710	598	496	716	531	546	416	447	high	1	1	1	1	1	1	1	1	1	551	716	682	952	739	930	654	491	825
22	1	1	1	1	1	1	1	1	1	484	528	808	539	454	631	446	501	722	high	1	1	1	1	1	1	1	1	1	705	1237	1052	620	700	426	1558	523	636
23	1	1	1	1	1	1	1	1	1	544	502	528	497	552	487	507	449	496	high	1	1	1	1	1	1	1	1	1	585	825	635	417	810	901	437	810	775
24	1	1	1	1	1	1	1	1	1	486	504	551	568	517	507	584	585	533	high	1	1	1	1	1	1	1	1	1	499	743	759	728	797	462	1160	486	716
25	1	1	1	1	1	1	1	1	1	517	1307	1156	1142	553	581	503	538	679	high	1	1	1	1	1	1	1	1	1	2819	1514	2117	3824	2922	2017	2210	3434	2144
26	1	1	1	1	1	1	1	1	1	600	587	734	1403	445	593	741	475	495	high	1	1	1	0	1	1	1	1	1	1610	2350	3782	3018	2736	2037	2518	2290	1818
27	1	1	1	0	1	1	1	1	1	1853	656	535	431	660	618	500	560	929	high	1	1	1	1	1	1	1	0	1	2804	2416	1804	2664	2711	2718	3103	2865	2942
28	1	1	1	1	1	1	1	1	1	531	684	559	744	516	446	559	792	556	high	1	1	1	1	1	1	1	1	1	3422	1591	2832	2197	1842	1927	2381	3124	1458
29	1	1	1	1	1	1	1	1	1	485	521	943	423	615	667	614	1036	721	high	1	1	1	1	1	1	1	1	1	3139	2391	2396	3148	2221	3195	3215	2385	2825
30	1	1	1	1	1	1	1	1	1	874	558	518	751	511	505	426	456	509	high	1	1	1	1	1	1	1	1	1	2694	2672	2070	2121	1987	2415	2525	2967	1567
31	1	1	1	1	1	1	1	1	1	971	980	588	598	459	700	522	647	569	high	0	1	1	1	1	1	1	1	1	3713	2218	2644	3408	2486	2979	1907	2673	2885
32	1	1	1	1	1	1	1	1	1	870	611	1000	596	590	536	598	1108	613	high	1	1	1	1	1	1	1	1	1	2681	2693	2306	1884	2889	2356	3340	2202	2661
33	1	1	1	1	1	1	1	1	1	887	493	576	640	566	470	702	614	757	high	1	1	1	1	1	1	1	1	1	2823	2311	2356	2590	2529	2119	2763	2029	2244
34	1	1	1	1	1	1	1	1	1	648	560	767	799	723	994	818	589	639	high	1	1	1	1	0	1	1	1	1	2480	2374	2765	2999	1950	2022	2652	2387	2756
35	1	1	1	1	1	1	1	1	1	615	932	616	584	595	554	521	618	517	high	1	1	0	1	1	1	1	1	0	1811	2476	2582	2489	2450	2074	3552	2526	2427
36	1	1	1	1	1	1	1	1	1	709	720	794	778	545	746	634	500	655	high	1	1	1	1	1	1	1	1	1	2345	2425	2977	2266	2632	2542	1974	2602	2163
37	1	1	1	1	1	1	1	1	1	547	1005	495	531	863	481	597	558	572	high	1	1	1	1	1	1	1	1	1	2417	2168	2179	2242	1828	1939	2462	2412	3431
38	1	1	1	1	1	1	1	1	1	635	577	622	772	643	628	834	683	457	high	1	1	1	1	1	1	1	1	1	3888	3595	1626	2343	2785	2661	1965	2485	2190
39	1	1	1	1	1	1	1	1	1	639	504	607	597	475	699	786	571	700	high	1	1	1	1	1	1	1	1	1	2522	1821	1803	2646	1924	2376	1547	2260	1347
40	1	1	1	1	1	1	1	1	1	475	643	524	493	601	607	588	488	563	high	1	1	1	1	1	0	1	1	1	2183	2486	2352	2637	2355	1994	2227	1755	2962

[truncated: 15 more sheets: 11, 12, 13, 14, 15, 16, 17, 18, 19, 20, 21, 22, 23, 24, 25]
